# Supplementary material for: Impact of the New Cooperative Medical Scheme on the trend of catastrophic health expenditure in Chinese rural households: results from nationally representative surveys from 2003 to 2013
Source: PubMed Central journal article supplement — BMJ Open. 2018 Feb 8;8(2):e019442. doi: 10.1136/bmjopen-2017-019442 (PMC5829910; doi:10.1136/bmjopen-2017-019442), 2018-02-08
Supplement: bmjopen-2017-019442.draft_revisions.pdf [file bmjopen-2017-019442.draft_revisions.pdf]

# BMJ Open

BMJ Open is committed to open peer review. As part of this commitment we make the peer review history of every article we publish publicly available.

When an article is published we post the peer reviewers' comments and the authors' responses online. We also post the versions of the paper that were used during peer review. These are the versions that the peer review comments apply to.

The versions of the paper that follow are the versions that were submitted during the peer review process. They are not the versions of record or the final published versions. They should not be cited or distributed as the published version of this manuscript.

BMJ Open is an open access journal and the full, final, typeset and author-corrected version of record of the manuscript is available on our site with no access controls, subscription charges or pay-per-view fees (<http://bmjopen.bmj.com>).

If you have any questions on BMJ Open's open peer review process please email [editorial.bmjopen@bmj.com](mailto:editorial.bmjopen@bmj.com)

# BMJ Open

## Impact of New Cooperative Medical Scheme on the Trend of Catastrophic Health Expenditure in Rural Households with Hospitalized Members from 2003 to 2013

|                                 |                                                                                                                                                  |
|---------------------------------|--------------------------------------------------------------------------------------------------------------------------------------------------|
| Journal:                        | <i>BMJ Open</i>                                                                                                                                  |
| Manuscript ID                   | bmjopen-2017-019442                                                                                                                              |
| Article Type:                   | Research                                                                                                                                         |
| Date Submitted by the Author:   | 01-Sep-2017                                                                                                                                      |
| Complete List of Authors:       | Xie, Biao<br>Huo, Minghe<br>Wang, Zhiqiang; University of Queensland, School of Medicine<br>Chen, Yongjie<br>Fu, Rong<br>Liu, Meina<br>Meng, Qun |
| <b>Primary Subject Heading</b>: | Health services research                                                                                                                         |
| Secondary Subject Heading:      | Health services research, Health policy, Health economics                                                                                        |
| Keywords:                       | CHE, NCMS, NHSS, rural households with hospitalized members                                                                                      |
|                                 |                                                                                                                                                  |

SCHOLARONE™  
Manuscripts

Only

1  
2  
3  
4  
5  
6  
7  
8

## **Impact of New Cooperative Medical Scheme on the Trend of Catastrophic Health Expenditure in Rural Households with Hospitalized Members from 2003 to 2013**

9 Biao Xie<sup>1</sup> PHD, Minghe Huo<sup>2</sup> PHD, Zhiqiang Wang<sup>3</sup> PHD, Yongjie Chen<sup>1</sup> PHD, Rong Fu<sup>4</sup> PHD,  
10 Meina Liu<sup>1\*</sup> PHD, Qun Meng<sup>2\*</sup> PHD

11  
12  
13 <sup>1</sup>Department of Biostatistics, Public Health College, Harbin Medical University, Harbin City,  
14 Heilongjiang Province, China.

15  
16 <sup>2</sup>Department of Health management, Public Health College, Harbin Medical University, Harbin  
17 City, Heilongjiang Province, China.

18  
19 <sup>3</sup>School of Medicine, the University of Queensland, Room 817, Health Sciences Building, Royal  
20 Brisbane & Women's Hospital, Herston QLD, Australia.

21  
22 <sup>4</sup>Department of Epidemiology and Biostatistics, Public Health College, Fujian Medical University,  
23 Fuzhou City, Fujian Province, China.

24  
25  
26  
27  
28 \*Correspondence author: [liumeina369@163.com](mailto:liumeina369@163.com) and [mengqun@nhfpc.gov.cn](mailto:mengqun@nhfpc.gov.cn) Fax:  
29 +86+(0451)87502680, Telephone Number: +86+(0451)87502680  
30  
31  
32  
33  
34  
35  
36  
37  
38  
39  
40  
41  
42  
43  
44  
45  
46  
47  
48  
49  
50  
51  
52  
53  
54  
55  
56  
57  
58  
59  
60

## Abstract

**Objective** To evaluate the trend of catastrophic health expenses (CHE) for inpatient care in relation to the commencement of New Cooperative Medical Scheme (NCMS) in rural China from 2003 to 2013 and the roles of NCMS in protecting affected households from CHE.

**Methods** We assessed 10-year trend of the incidence and severity of CHE in rural households with hospitalized members using the data from Chinese National Health Services Survey (NHSS). Generalized Estimating Equations (GEE) was used to estimate the odds ratio (OR) and 95% confidence interval (CI) for the association between incidence rates of CHE ( $R_{\text{CHE}}$ ) and NCMS reimbursement.

**Results** The incidence and severity of CHE after NCMS reimbursement both decreased and their changes increased rapidly from 2003 to 2013. After adjustment of the covariates, the  $R_{\text{CHE}}$  before reimbursement was significantly higher than that after reimbursement and the OR (95% CI) was 1.50(1.24-1.81), 1.79(1.69-1.90) and 2.94(2.77-3.11) in the year of 2003, 2008 and 2013, respectively.

**Conclusion** The incidence and severity of CHE both reduced after NCMS reimbursements in each year. Excluding some confounding factors,  $R_{\text{CHE}}$  was significantly associated with NCMS reimbursement. The NCMS partly protected the rural households with hospitalized members from CHE. However, the inequalities between different income groups still existed. The  $R_{\text{CHE}}$  in rural households with hospitalized members in three years were still rather high even though they were covered with NCMS. This study will provide suggestions for further reforms in China and guidance for other developing countries.

**Keywords** CHE; rural households with hospitalized members; NCMS; NHSS.

### Strengths and limitations of this study

- ▶ Most studies focused on a specific local area or the short-term effect of New Cooperative Medical System (NCMS) on catastrophic health expenses (CHE) in China. We assessed 10-year trend of the incidence and severity of CHE at national level using the data from the Chinese National Health Services Survey (NHSS).
- ▶ NCMS focused on inpatient care reimbursement. However, few previous studies had focused on rural households with hospitalized members. We assessed CHE in such affected rural households.
- ▶ Household income was transformed by Consumer Price Index (CPI). Three indicators were used to capture the catastrophe's incidence and intensity. Data was disaggregated by three geographic regions (east, central and west) and four household income levels. Generalized Estimating Equations (GEE) was used to estimate OR and 95% CI for the association between the catastrophe's incidence and NCMS reimbursement.
- ▶ The NCMS was at the start stage in 2003 and the coverage was very low in rural China. Therefore, the sample size in 2003 was small with only 338 households. Our estimates may not be adequate. We only focused on the rural households with hospitalized members covered by the NCMS. Thus, our findings should be interpreted cautiously.

## Introduction

The New Cooperative Medical System (NCMS) was introduced to rural China in 2003. It was designed to provide financial protection for its enrollees. In terms of the enrollment size, NCMS is by far the largest health insurance plan in the world.<sup>2</sup> Catastrophic health expenses (CHE) is defined as an out-of-pocket health expenditure which is larger than 40% of the household's capacity to pay (CTP).<sup>1</sup> CHE is an indicator reflecting the effectiveness of financial protection a health insurance could provide for its members. In 2008, 15.1% of the rural households and 35.0% of the rural households with hospitalized members faced CHE in China.<sup>3,4</sup> It was essential to evaluate the role of NCMS in preventing CHE among its members. There had been many studies measuring the impact of NCMS. However, most studies focused on a specific local area or the short-term effect of NCMS on CHE in China.<sup>3-10</sup> NCMS focused on inpatient care reimbursement. Among studies on the impact of NCMS on CHE, those focusing on affected rural households with hospitalized members were valuable. However, few previous studies had focused on such affected rural households.

We assessed 10-year trend of the incidence and severity of CHE in rural households with hospitalized members at national level using the data from the Chinese National Health Services Survey (NHSS). The trend of CHE for inpatient care in relation to the commencement of NCMS in rural China from 2003 to 2013 and the roles of NCMS in protecting affected households from CHE can provide evidence for NCMS in improving the financial protection for Chinese residents. As an exploratory attempt to study the impact of NCMS on CHE of rural households with hospitalized members, this study can provide some recommendations for the next phase of health reform for policy-makers.

## Method

### Data source and study population

Data used in this study was derived from the Chinese Third NHSS in 2003, the Fourth NHSS in 2008 and the Fifth NHSS in 2013. As the largest statewide health survey in China, the NHSS was organized by the Chinese government every 5 years since 1993. The NHSS was done with a robust multi-stage and stratified random cluster sampling method.<sup>11</sup> A total of 94 counties were selected from 2859 counties in 31 provinces, autonomous regions, and municipalities in China. In each county, five townships were selected within which two villages were selected. A total of 470 townships and 940 villages were included. In each village, 60 households were selected.<sup>12</sup> The institutional review board of the Chinese National Bureau of Statistics provided review and ethics approval of the survey. A district survey manager checked the questionnaires at the end of each day to avoid missing information or logic errors. 5% of the sampled households were randomly selected to be revisited to examine survey quality (95% was achieved).<sup>11</sup> According to a test conducted by the Health Statistical Center of the Ministry of Health of China, the survey data was representative of the age and structure of overall national population compared with the 2007 National Sampling Survey of Population Change.<sup>11</sup>

This study focused on the incidence and severity of CHE of rural households with hospitalized members covered by NCMS. Households which didn't join NCMS or didn't use inpatient services were not covered. This yielded a final sample of 6975 households which experienced inpatient care during the study period (180 in 2003, 2326 in 2008 and 4469 in 2013).

### The introduction of indicators

Out-of-pocket health expenditure payment (OOP) refers to the expenditure made by each household member after they receive health services without compensations from a third party. The poverty line is the average food expenditure of households of which food share is in the 45th to 55th percentile range. This poverty line multiplied

by the equalized household size (actual household size<sup>0.56</sup>) is household subsistence spending. CTP is generally defined as a non-subsistence spending. However, when food expenditure is lower than subsistence spending in some households, the non-food expenditure is used as non-subsistence spending in this particular situation.<sup>1</sup>

<sup>4</sup> The information on the questions in the questionnaire of NHSS employed to calculate indicators below were showed in Supplementary information.

#### (1) The incidence rates of CHE

There were various definitions of CHE, we employed the method recommended by World Health Organization (WHO) for calculating CHE in this study. An OOP is considered financially catastrophic when it is larger than 40% of the household's CTP.<sup>1</sup> Let  $R_{CHE}$  denotes the incidence rates of CHE, which can be calculated as

$$R_{CHE} = \frac{1}{N} \sum_{i=1}^N E_i \quad (1)$$

Where  $N$  represents the sample size.  $E_i = 1$  when  $^{OOP}/_{CTP} \geq 0.4$ ;  $E_i = 0$  when  $^{OOP}/_{CTP} < 0.4$ .

#### (2) The definitions and calculations of mean CHE gap ( $G_{CHE}$ ) and mean positive CHE gap ( $MPG_{CHE}$ )

The  $G_{CHE}$  describes how much of a household's health expenditure is in excess of the threshold of 40% of its CTP, which is estimated to reveal the average level of CHE severity for all studied households. The  $MPG_{CHE}$  refers to the average of the sum of the total excesses from all the catastrophic households in the sample.<sup>1</sup>  $G_{CHE}$  and  $MPG_{CHE}$  can be calculated as

$$G_{CHE} = \frac{1}{N} \sum_{i=1}^N O_i \quad (2)$$

$$MPG_{CHE} = \frac{\sum_{i=1}^N O_i}{\sum_{i=1}^N E_i} \quad (3)$$

Where  $O_i = ^{OOP}/_{CTP} - 0.4$  when  $^{OOP}/_{CTP} > 0.4$ ;  $O_i = 0$  when  $^{OOP}/_{CTP} \leq 0.4$ .

### Statistical analysis

Categorical variables and expenditure measures were described by numbers



1  
2  
3 (percentages) and means (standard deviation), respectively. Annual household income  
4 in 2008 and 2013 was transformed by Consumer Price Index (CPI) to the price level  
5 in 2003 with the transformation formula: real price = nominal price×(CPI of base  
6 year/CPI of object year).<sup>18</sup> Annual household income was classified as quartiles.  
7  
8 Three indicators above captured the catastrophe's incidence and intensity. We used  
9 stratification analysis to assess the 10-year trend of these indicators before and after  
10 NCMS reimbursement. The impact of NCMS in each year was reflected in the  
11 difference in CHE before and after reimbursement. The trend of difference from 2003  
12 to 2013 reflected overall change of the impact of NCMS. Data was disaggregated by  
13 three geographic regions (east, central and west) and four household income levels.  
14  
15 The  $R_{\text{CHE}}$  of each household had two records in each year, one before NCMS  
16 reimbursement and one after. We took it as a repeated measures analysis. Generalized  
17 Estimating Equations (GEE) was used to estimate OR and 95% CI for the association  
18 between the  $R_{\text{CHE}}$  and NCMS reimbursement. Covariates including age, gender,  
19 education of household head, household size, and one or more members older than 60  
20 years were adjusted. All of the analyses were performed using SAS 9.2 (SAS Institute  
21 Inc., Cary, NC, USA). A two-sided  $P < 0.05$  was established as the level of statistical  
22 significance for all tests.  
23  
24  
25  
26  
27  
28  
29  
30  
31  
32  
33  
34  
35  
36  
37  
38  
39  
40  
41  
42  
43  
44  
45  
46  
47  
48  
49  
50  
51  
52  
53  
54  
55  
56  
57  
58  
59  
60

## Result

### Characteristics of Households

Characteristics of all households enrolled in the study in 2003, 2008 and 2013 were shown in Table 1. The age of householders increased from 2003 to 2013, 49.38% of the householders were of age 60 or older in 2013. The proportion of households with one or more members younger than 5 years decreased from 17.78% in 2003 to 14.84% in 2013. The proportion of households with people of age 60 or older showed a 12.96% increase from 2003 to 2013. The proportion of householders with a junior high school or higher degree increased from 31.67% in 2003 to 40.17% in 2013. Annual household income of each year was divided into quartiles, with each quartile cutoffs shifting upward from 2003 to 2013.

**Table 1. Characteristics of all households enrolled in the study**

| Characteristics                          | 2003 (N=180) |       | 2008 (N= 2326) |       | 2013 (N= 4469) |       |
|------------------------------------------|--------------|-------|----------------|-------|----------------|-------|
|                                          | n            | %     | n              | %     | n              | %     |
| <b>Household characteristics</b>         |              |       |                |       |                |       |
| Number of household members              |              |       |                |       |                |       |
| <5                                       | 128          | 71.11 | 1916           | 82.37 | 3971           | 88.86 |
| ≥5                                       | 52           | 28.89 | 410            | 17.63 | 498            | 11.14 |
| One or more members older than 60 years  |              |       |                |       |                |       |
| No                                       | 104          | 57.78 | 1267           | 54.47 | 2003           | 44.82 |
| Yes                                      | 76           | 42.22 | 1059           | 45.53 | 2466           | 55.18 |
| One or more members younger than 5 years |              |       |                |       |                |       |
| No                                       | 148          | 82.22 | 1948           | 83.75 | 3806           | 85.16 |
| Yes                                      | 32           | 17.78 | 378            | 16.25 | 663            | 14.84 |
| Time spent                               |              |       |                |       |                |       |

|                        |          |          |          |          |          |          |  |
|------------------------|----------|----------|----------|----------|----------|----------|--|
| travelling to          |          |          |          |          |          |          |  |
| the nearest            |          |          |          |          |          |          |  |
| medical                |          |          |          |          |          |          |  |
| center                 |          |          |          |          |          |          |  |
| ≤15min                 | 145      | 80.56    | 1701     | 73.13    | 3532     | 79.03    |  |
| >15min                 | 35       | 19.44    | 625      | 26.87    | 937      | 20.97    |  |
| The number             |          |          |          |          |          |          |  |
| of                     |          |          |          |          |          |          |  |
| observations           |          |          |          |          |          |          |  |
| in each region         |          |          |          |          |          |          |  |
| East                   | 113      | 62.78    | 626      | 26.91    | 991      | 22.17    |  |
| Centre                 | 14       | 7.78     | 759      | 32.63    | 1670     | 37.37    |  |
| West                   | 53       | 29.44    | 941      | 40.46    | 1808     | 40.46    |  |
| Annual                 |          |          |          |          |          |          |  |
| household              |          |          |          |          |          |          |  |
| income*                |          |          |          |          |          |          |  |
| Q 1                    | 2643.33  | 1265.69  | 3956.52  | 1680.38  | 4785.49  | 2590.40  |  |
| Q 2                    | 6914.23  | 1353.25  | 9062.74  | 1247.41  | 13003.64 | 2841.22  |  |
| Q 3                    | 13505    | 2716.15  | 14699.42 | 2065.84  | 25958.15 | 5174.25  |  |
| Q 4                    | 29194.35 | 10927.31 | 31665.48 | 20295.22 | 61082.23 | 44409.99 |  |
| <b>householders'</b>   |          |          |          |          |          |          |  |
| <b>characteristics</b> |          |          |          |          |          |          |  |
| Gender                 |          |          |          |          |          |          |  |
| Male                   | 131      | 72.78    | 1796     | 77.21    | 3373     | 75.48    |  |
| Female                 | 49       | 27.22    | 530      | 22.79    | 1096     | 24.52    |  |
| Age                    |          |          |          |          |          |          |  |
| <60                    | 120      | 66.67    | 1442     | 61.99    | 2262     | 50.62    |  |
| ≥60                    | 60       | 33.33    | 884      | 38.01    | 2207     | 49.38    |  |
| Marital status         |          |          |          |          |          |          |  |
| Unmarried              | 4        | 2.22     | 47       | 2.02     | 72       | 1.61     |  |
| Married                | 155      | 86.11    | 1953     | 83.96    | 3735     | 83.58    |  |
| Divorced               | 0        | 0        | 29       | 1.25     | 612      | 13.69    |  |
| Widow or               |          |          |          |          |          |          |  |
| others                 | 21       | 11.67    | 297      | 12.77    | 50       | 1.12     |  |
| Education              |          |          |          |          |          |          |  |
| Illiterate             | 52       | 28.89    | 511      | 21.98    | 811      | 18.15    |  |
| Elementary             |          |          |          |          |          |          |  |
| school                 | 71       | 39.44    | 917      | 39.44    | 1863     | 41.69    |  |
| Junior high            |          |          |          |          |          |          |  |
| school                 | 48       | 26.67    | 722      | 31.05    | 1418     | 31.73    |  |
| Senior high            |          |          |          |          |          |          |  |
| school or              | 9        | 5.00     | 175      | 7.53     | 377      | 8.44     |  |
| above                  |          |          |          |          |          |          |  |
| Employment             |          |          |          |          |          |          |  |

|          |     |       |      |       |      |       |
|----------|-----|-------|------|-------|------|-------|
| Employed | 126 | 70.00 | 1817 | 78.12 | 3222 | 72.10 |
| Retired  | 12  | 6.67  | 60   | 2.58  | 157  | 3.51  |
| Others   | 42  | 23.33 | 449  | 19.30 | 1090 | 24.39 |

\*Annual household income of each year was divided into four levels according to the quartile, the mean and standard deviation of each level were calculated.

### **The incidence rates of CHE**

Table 2 showed the  $R_{\text{CHE}}$  among all the studied households. After NCMS reimbursement, the total  $R_{\text{CHE}}$  decreased rapidly, from 49.44% in 2003 to 34.88% in 2013. The change of the total  $R_{\text{CHE}}$  before and after reimbursement increased rapidly, from 9.45% in 2003 to 24.10% in 2013. A similar pattern was observed in different regions and different income levels. In addition, the poorest had the highest incidence and the change in the west region was bigger than those in other regions.

1  
2  
3  
4  
5  
6  
7  
8  
9  
10  
11  
12  
13  
14  
15  
16  
17  
18  
19  
20  
21  
22  
23  
24  
25  
26  
27  
28  
29  
30  
31  
32  
33  
34  
35  
36  
37  
38  
39  
40  
41  
42  
43  
44  
45  
46  
47

**Table 2. Results of the incidence rates of CHE among all the studied households**

| $R_{CHE}$ | 2003                 |                     |        | 2008                 |                     |        | 2013                 |                     |        |
|-----------|----------------------|---------------------|--------|----------------------|---------------------|--------|----------------------|---------------------|--------|
|           | Before reimbursement | After reimbursement | Change | Before reimbursement | After reimbursement | Change | Before reimbursement | After reimbursement | Change |
| Total     | 58.89                | 49.44               | 9.45   | 54.90                | 41.75               | 13.15  | 58.98                | 34.88               | 24.10  |
| East      | 58.41                | 50.44               | 7.97   | 58.79                | 46.49               | 12.30  | 63.47                | 39.56               | 23.91  |
| Centre    | 85.71                | 85.71               | 0      | 49.54                | 38.47               | 11.07  | 57.13                | 35.51               | 21.62  |
| West      | 52.83                | 37.74               | 15.09  | 56.64                | 41.23               | 15.41  | 58.24                | 31.75               | 26.49  |
| Q1        | 71.11                | 71.11               | 0      | 78.65                | 60.67               | 17.98  | 86.25                | 58.75               | 27.50  |
| Q2        | 60.47                | 48.84               | 11.63  | 59.32                | 44.30               | 15.02  | 73.61                | 43.13               | 30.48  |
| Q3        | 60.87                | 45.65               | 15.22  | 50.93                | 39.22               | 11.71  | 54.79                | 29.16               | 25.63  |
| Q4        | 43.48                | 32.61               | 10.87  | 37.23                | 27.88               | 9.35   | 32.86                | 18.39               | 14.47  |

### The Severity of CHE

The severity of CHE among all the studied households was shown in Table 3. After NCMS reimbursement, the total  $G_{CHE}$  exhibited a decreased trend, from 12.57% in 2003 to 8.15% in 2013. The change of the total  $G_{CHE}$  before and after reimbursement increased rapidly from 8.94% in 2003 to 33.50% in 2013. Different regions and different income levels had similar patterns. In addition, the highest  $G_{CHE}$  was observed in the poorest areas. A similar trend could be observed in  $MPG_{CHE}$ . The change of  $MPG_{CHE}$  was higher than that of  $G_{CHE}$  in each year.

1  
2  
3  
4  
5  
6  
7  
8  
9  
10  
11  
12  
13  
14  
15  
16  
17  
18  
19  
20  
21  
22  
23  
24  
25  
26  
27  
28  
29  
30  
31  
32  
33  
34  
35  
36  
37  
38  
39  
40  
41  
42  
43  
44  
45  
46  
47

**Table 3. Results of the severity of CHE among all the studied households**

| Indicators               | 2003                 |                     |        | 2008                 |                     |        | 2013                 |                     |        |
|--------------------------|----------------------|---------------------|--------|----------------------|---------------------|--------|----------------------|---------------------|--------|
|                          | Before reimbursement | After reimbursement | Change | Before reimbursement | After reimbursement | Change | Before reimbursement | After reimbursement | Change |
| <i>G<sub>CHE</sub></i>   |                      |                     |        |                      |                     |        |                      |                     |        |
| Total                    | 21.51                | 12.57               | 8.94   | 23.23                | 10.08               | 13.15  | 41.65                | 8.15                | 33.50  |
| East                     | 19.54                | 13.56               | 5.98   | 28.54                | 12.54               | 16.00  | 56.92                | 10.51               | 46.41  |
| Centre                   | 25.12                | 25.12               | 0      | 20.28                | 8.74                | 11.54  | 38.00                | 8.29                | 29.71  |
| West                     | 24.73                | 7.15                | 17.58  | 22.09                | 9.52                | 12.57  | 36.64                | 6.72                | 29.92  |
| Q1                       | 26.37                | 21.66               | 4.71   | 42.80                | 16.32               | 26.48  | 86.46                | 15.96               | 70.50  |
| Q2                       | 28.51                | 12.94               | 15.57  | 22.77                | 10.17               | 12.60  | 57.13                | 9.57                | 47.56  |
| Q3                       | 18.70                | 9.06                | 9.64   | 17.38                | 8.57                | 8.81   | 28.70                | 6.02                | 22.68  |
| Q4                       | 13.01                | 6.85                | 6.16   | 13.56                | 6.55                | 7.01   | 13.90                | 4.05                | 9.85   |
| <i>MPG<sub>CHE</sub></i> |                      |                     |        |                      |                     |        |                      |                     |        |
| Total                    | 36.52                | 25.43               | 11.09  | 42.32                | 24.14               | 18.18  | 70.61                | 23.35               | 47.26  |
| East                     | 33.46                | 26.88               | 6.58   | 48.54                | 26.97               | 21.57  | 89.67                | 26.58               | 63.09  |
| Centre                   | 29.31                | 29.31               | 0      | 40.94                | 22.73               | 18.21  | 66.53                | 23.33               | 43.20  |
| West                     | 46.82                | 18.95               | 27.87  | 39.00                | 23.09               | 15.91  | 62.91                | 21.16               | 41.75  |
| Q1                       | 37.07                | 30.46               | 6.61   | 54.41                | 26.90               | 27.51  | 100.24               | 27.17               | 73.07  |
| Q2                       | 47.15                | 26.50               | 20.65  | 38.38                | 22.96               | 15.42  | 77.61                | 22.19               | 55.42  |
| Q3                       | 30.72                | 19.84               | 10.88  | 34.12                | 21.86               | 12.26  | 52.38                | 20.65               | 31.73  |
| Q4                       | 29.93                | 21.01               | 8.92   | 36.42                | 23.48               | 12.94  | 42.32                | 22.03               | 20.29  |

### The influence of NCMS on the incidence rates of CHE

Table 4 showed the influence of NCMS on  $R_{CHE}$ . In the aggregate, the  $R_{CHE}$  before NCMS reimbursement was significantly higher than that after NCMS reimbursement and the OR (95% CI) was 1.46(1.23-1.74), 1.70(1.61-1.80) and 2.68(2.54-2.83) in 2003, 2008 and 2013, respectively. The OR changed rapidly. There was a 16.44% increase in the year 2008 compared to 2003 and a 57.65% increase in the year 2013 compared to 2008. After adjustment of the covariates, the OR (95% CI) was 1.50(1.24-1.81), 1.79(1.69-1.90) and 2.94(2.77-3.11) in 2003, 2008 and 2013, respectively. There was a 19.33% increase in the year 2008 compared to 2003 and a 64.25% increase in the year 2013 compared to 2008. A similar pattern was observed in different regions and at different income levels but there were several exceptions in central region and the lowest income groups of 2003 where the  $R_{CHE}$  before NCMS reimbursement was not significantly higher than that after NCMS reimbursements. Among these covariates, the protection factors of the CHE were the male gender of the householder, higher level of education of the householder and bigger household size. The risk factors of the CHE were having one or more members older than 60 and the older age of the householder (Supplementary information).

**Table 4. The influence of NCMS on the incidence rates of CHE**

|         | Year | Change | Crude           |               | Adjusted        |               |
|---------|------|--------|-----------------|---------------|-----------------|---------------|
|         |      |        | OR (95 % CI)    | Increment (%) | OR (95 % CI)    | Increment (%) |
| Total   | 2003 | 9.45   | 1.46(1.23-1.74) | -             | 1.50(1.24-1.81) | -             |
|         | 2008 | 13.15  | 1.70(1.61-1.80) | 16.44         | 1.79(1.69-1.90) | 19.33         |
|         | 2013 | 24.10  | 2.68(2.54-2.83) | 57.65         | 2.94(2.77-3.11) | 64.25         |
| Area    |      |        |                 |               |                 |               |
| East    | 2003 | 7.97   | 1.38(1.13-1.69) | -             | 1.43(1.14-1.80) | -             |
|         | 2008 | 12.30  | 1.64(1.48-1.82) | 18.84         | 1.77(1.57-1.99) | 23.78         |
|         | 2013 | 23.91  | 2.66(2.37-2.97) | 62.20         | 3.08(2.71-3.50) | 74.01         |
| Central | 2003 | 0      | 1.00(1.00-1.00) | -             | 1.00(1.00-1.00) | -             |
|         | 2008 | 11.07  | 1.57(1.43-1.72) | 57            | 1.64(1.49-1.82) | 64.00         |
|         | 2013 | 21.62  | 2.42(2.23-2.63) | 54.14         | 2.63(2.40-2.88) | 60.37         |



|    |                                                                                                       |      |       |                 |        |                 |        |
|----|-------------------------------------------------------------------------------------------------------|------|-------|-----------------|--------|-----------------|--------|
| 1  |                                                                                                       |      |       |                 |        |                 |        |
| 2  |                                                                                                       |      |       |                 |        |                 |        |
| 3  | West                                                                                                  |      |       |                 |        |                 |        |
| 4  |                                                                                                       | 2003 | 15.09 | 1.85(1.24-2.75) | -      | 1.86(1.23-2.82) | -      |
| 5  |                                                                                                       | 2008 | 15.41 | 1.86(1.69-2.05) | 0.54   | 1.96(1.77-2.16) | 5.38   |
| 6  |                                                                                                       | 2013 | 26.49 | 3.00(2.74-3.28) | 61.29  | 3.22(2.93-3.55) | 64.29  |
| 7  |                                                                                                       |      |       |                 |        |                 |        |
| 8  | Income                                                                                                |      |       |                 |        |                 |        |
| 9  | Q1                                                                                                    |      |       |                 |        |                 |        |
| 10 |                                                                                                       | 2003 | 0     | 1.00(1.00-1.00) | -      | 1.00(1.00-1.00) | -      |
| 11 |                                                                                                       | 2008 | 17.98 | 2.39(2.03-2.81) | 139.00 | 2.56(2.16-3.04) | 156.00 |
| 12 |                                                                                                       | 2013 | 27.50 | 4.40(3.70-5.24) | 84.10  | 4.65(3.89-5.55) | 81.64  |
| 13 |                                                                                                       |      |       |                 |        |                 |        |
| 14 | Q2                                                                                                    |      |       |                 |        |                 |        |
| 15 |                                                                                                       | 2003 | 11.63 | 1.60(1.08-2.37) | -      | 1.63(1.08-2.45) | -      |
| 16 |                                                                                                       | 2008 | 15.02 | 1.83(1.62-2.08) | 14.38  | 1.90(1.67-2.16) | 16.56  |
| 17 |                                                                                                       | 2013 | 30.48 | 3.68(3.19-4.25) | 101.09 | 3.86(3.32-4.49) | 103.16 |
| 18 |                                                                                                       |      |       |                 |        |                 |        |
| 19 | Q3                                                                                                    |      |       |                 |        |                 |        |
| 20 |                                                                                                       | 2003 | 15.22 | 1.85(1.21-2.84) | -      | 1.89(1.23-1.92) | -      |
| 21 |                                                                                                       | 2008 | 11.71 | 1.61(1.44-1.80) | -12.97 | 1.63(1.46-1.83) | -13.76 |
| 22 |                                                                                                       | 2013 | 25.63 | 2.94(2.68-3.23) | 82.61  | 3.04(2.76-3.35) | 86.50  |
| 23 |                                                                                                       |      |       |                 |        |                 |        |
| 24 | Q4                                                                                                    |      |       |                 |        |                 |        |
| 25 |                                                                                                       | 2003 | 10.87 | 1.59(1.08-2.34) | -      | 1.62(1.08-2.41) | -      |
| 26 |                                                                                                       | 2008 | 9.35  | 1.53(1.39-1.69) | -3.77  | 1.55(1.41-1.72) | -4.32  |
| 27 |                                                                                                       | 2013 | 14.47 | 2.17(1.94-2.43) | 41.83  | 2.21(1.97-2.48) | 42.58  |
| 28 |                                                                                                       |      |       |                 |        |                 |        |
| 29 |                                                                                                       |      |       |                 |        |                 |        |
| 30 |                                                                                                       |      |       |                 |        |                 |        |
| 31 |                                                                                                       |      |       |                 |        |                 |        |
| 32 |                                                                                                       |      |       |                 |        |                 |        |
| 33 | <b>Discussion</b>                                                                                     |      |       |                 |        |                 |        |
| 34 |                                                                                                       |      |       |                 |        |                 |        |
| 35 | According to Chinese NHSS in 1998 and 2003, rural residents' health expenditures                      |      |       |                 |        |                 |        |
| 36 | grew at an annual rate of 11.48%, which was four times faster than their net income. <sup>18</sup>    |      |       |                 |        |                 |        |
| 37 |                                                                                                       |      |       |                 |        |                 |        |
| 38 | High healthcare expenses in the absence of financial protection forced these rural                    |      |       |                 |        |                 |        |
| 39 | households to fall into a difficult circumstance: "It's too difficult to see a doctor, and            |      |       |                 |        |                 |        |
| 40 | too expensive to seek health care!" <sup>18</sup> In 2003, 96% of rural households in China           |      |       |                 |        |                 |        |
| 41 | lacked medical insurance, and 38% of the sick didn't seek medical attention. <sup>11 18</sup> To      |      |       |                 |        |                 |        |
| 42 | address this issue, NCMS was introduced to Chinese rural areas in 2003. With great                    |      |       |                 |        |                 |        |
| 43 | efforts of the government, NCMS had experienced rapid growth in coverage. By 2011,                    |      |       |                 |        |                 |        |
| 44 | 97.5% of the rural population had been covered by NCMS in China. <sup>3 17-18</sup> This had          |      |       |                 |        |                 |        |
| 45 | fuelled a significantly increased consumption of health services due to previously                    |      |       |                 |        |                 |        |
| 46 | latent unmet demand. From 2003 to 2008, the inpatient hospital admission rate for                     |      |       |                 |        |                 |        |
| 47 | rural residents almost doubled. <sup>2 4 18</sup> The $R_{CHE}$ of rural households with hospitalized |      |       |                 |        |                 |        |
| 48 |                                                                                                       |      |       |                 |        |                 |        |
| 49 |                                                                                                       |      |       |                 |        |                 |        |
| 50 |                                                                                                       |      |       |                 |        |                 |        |
| 51 |                                                                                                       |      |       |                 |        |                 |        |
| 52 |                                                                                                       |      |       |                 |        |                 |        |
| 53 |                                                                                                       |      |       |                 |        |                 |        |
| 54 |                                                                                                       |      |       |                 |        |                 |        |
| 55 |                                                                                                       |      |       |                 |        |                 |        |
| 56 |                                                                                                       |      |       |                 |        |                 |        |
| 57 |                                                                                                       |      |       |                 |        |                 |        |
| 58 |                                                                                                       |      |       |                 |        |                 |        |
| 59 |                                                                                                       |      |       |                 |        |                 |        |
| 60 |                                                                                                       |      |       |                 |        |                 |        |

## Discussion

According to Chinese NHSS in 1998 and 2003, rural residents' health expenditures grew at an annual rate of 11.48%, which was four times faster than their net income.<sup>18</sup> High healthcare expenses in the absence of financial protection forced these rural households to fall into a difficult circumstance: "It's too difficult to see a doctor, and too expensive to seek health care!"<sup>18</sup> In 2003, 96% of rural households in China lacked medical insurance, and 38% of the sick didn't seek medical attention.<sup>11 18</sup> To address this issue, NCMS was introduced to Chinese rural areas in 2003. With great efforts of the government, NCMS had experienced rapid growth in coverage. By 2011, 97.5% of the rural population had been covered by NCMS in China.<sup>3 17-18</sup> This had fuelled a significantly increased consumption of health services due to previously latent unmet demand. From 2003 to 2008, the inpatient hospital admission rate for rural residents almost doubled.<sup>2 4 18</sup> The  $R_{CHE}$  of rural households with hospitalized

1  
2  
3 members was much higher than other rural households.<sup>4</sup> It was meaningful to evaluate  
4 the effectiveness of NCMS to provide financial protection specifically for these rural  
5 households with hospitalized members.  
6  
7

8  
9 In our study,  $R_{\text{CHE}}$  of these households before NCMS reimbursement were  
10 58.89%, 54.90% and 58.98% for 2003, 2008 and 2013, respectively (Table 2).  
11 Approximately 60% of the households would fall into CHE and be susceptible to  
12 disease-induced poverty if they were not covered with NCMS in three years. After  
13 NCMS reimbursement, the  $R_{\text{CHE}}$  decreased with different degrees, which were lowered  
14 to 49.44%, 41.75% and 34.88% for 2003, 2008 and 2013, respectively (Table 2). The  
15 total  $G_{\text{CHE}}$  and  $MPG_{\text{CHE}}$  also decreased after NCMS reimbursement (Table 3). The  
16 incidence and severity of CHE before NCMS reimbursement were higher than that  
17 after NCMS reimbursement in three years, which confirmed the effectiveness of  
18 NCMS to reduce CHE. Moreover, after adjustment of the covariates,  $R_{\text{CHE}}$  was  
19 significantly associated with NCMS reimbursement ( $P < 0.05$ ) (Table 4). To some  
20 extent, the NCMS protected the rural households with hospitalized members from  
21 CHE. Inpatient reimbursement rates in rural areas had a remarkable achievement,  
22 increasing 7.5 times from 5.8% in 2003 to 43.7% in 2011.<sup>3</sup> The financial protection in  
23 rural areas have been steadily improved. An apparent enhancement could be seen in  
24 this protective effect from 2003 to 2013, especially after the 2009 Health Care Reform.  
25 To further preventing CHE, NCMS should increase financing level to provide a better  
26 benefit package, such as lowering the deductibles and co-payments, and setting higher  
27 reimbursement rates and ceilings. Having one or more members older than 60 in a  
28 household, female gender and older age of the householder, lower level of education  
29 of the householder and smaller household size increased the risk of incurring CHE in  
30 our study (Supplementary information). This was consistent with the previous  
31 studies.<sup>4 19-22</sup> The NCMS should make preferential policies for these high-risk  
32 populations, such as providing special subsidies to them.  
33  
34  
35  
36  
37  
38  
39  
40  
41  
42  
43  
44  
45  
46  
47  
48  
49  
50  
51  
52  
53

54 It was worth noting that the  $R_{\text{CHE}}$  in rural households with hospitalized members  
55 in three years were all more than 34% after NCMS reimbursement, which meant that  
56  
57

1  
2  
3 a number of households still faced CHE even though they were covered with NCMS  
4 (Table 2). Many studies had shown that CHE was very likely to occur in households  
5 with poor economic conditions.<sup>23-26</sup> The rural households with hospitalized members  
6 have heavy economic burdens and are likely to fall into such conditions. Thus, our  
7 study population tend to have higher proportion of CHE than previously reported in  
8 the whole rural households. Another reason for high proportion of CHE in these  
9 households is the limited numbers of drugs and treatments included in the scope of  
10 NCMS. Under the fee-for-service payment system in China, doctors had strong  
11 incentives to prescribe expensive drugs and examinations not included by NCMS.<sup>4</sup>  
12 The NCMS needs to increase financial investment to expand its catalogue of essential  
13 medicines, especially for medicines which could increase the profits of medical  
14 institutions and pharmaceutical factories. An effective monitoring system is needed to  
15 restrain oversupply of expensive medical services and ensures that first-line generic  
16 medicines are available and preferentially prescribed.  
17  
18  
19  
20  
21  
22  
23  
24  
25  
26  
27  
28  
29

30 We observed that all three indicators declined with the increase of household  
31 income in our study (Table 2 and Table 3). Low-income households were more likely  
32 to incur CHE than other groups. One of the main reasons is their limited ability to pay  
33 for non-subsistence spending. These households are likely to fall into CHE, even as a  
34 result of low health expenditure. This phenomenon had also been experienced in  
35 many developing countries in Asia.<sup>19 26 28 29</sup> The inequalities of three indicators  
36 between different income groups still existed from 2003 to 2013 (Table 2 and Table 3).  
37 A higher share of resources from central governments should be allocated to areas  
38 with poor economic capacity. The current medical financial assistance scheme (MFA),  
39 which was a scheme designed to provide support to the poor households for their  
40 CHE, should be further promoted to play a more efficient role in preventing CHE.  
41  
42  
43  
44  
45  
46  
47  
48  
49

50 The changes of  $R_{CHE}$  and OR before and after NCMS reimbursement in the west  
51 region were larger than the corresponding values in other regions in three years (Table  
52 2 and Table 4). A higher share of resources was allocated to west region. Inpatient  
53 reimbursement rates of east, central and west geographic regions in 2011 was 46.8%,  
54  
55  
56  
57  
58  
59  
60

1  
2  
3 41.2% and 51.2%, respectively.<sup>3 29</sup> Almost all three indicators after NCMS  
4 reimbursement decreased rapidly from 2003 to 2008 but slowed down from 2008 to  
5 2013 (Table 2 and Table 3). This is due to the worst health situation in 2003 and the  
6 saturated health situation in 2008.<sup>13 15</sup>

7  
8  
9  
10  
11 GEE is based on the quasi-likelihood function and generalized linear model. The  
12 advantage of GEE is to resolve the issues resulting from repeated measures that tend  
13 to be correlated.<sup>30</sup> The  $R_{\text{CHE}}$  of each household had two records, one before NCMS  
14 reimbursement and one after. We took it as a repeated measures analysis. We  
15 performed GEE with logit link including various covariates to estimate OR and 95%  
16 CI for the association between the  $R_{\text{CHE}}$  and NCMS reimbursement.

## 17 18 19 20 21 22 **Conclusion**

23  
24 The  $R_{\text{CHE}}$ ,  $G_{\text{CHE}}$  and  $MPG_{\text{CHE}}$  all decreased rapidly after NCMS reimbursement and their  
25 changes increased rapidly from 2003 to 2013. After adjustment of the covariates, the  
26  $R_{\text{CHE}}$  after NCMS reimbursement were significantly lower than that before NCMS  
27 reimbursements in each year. The NCMS partly protected the rural households with  
28 hospitalized members from CHE. The financial protection in rural areas had been  
29 steadily improved with the development of NCMS. However, the inequalities between  
30 different groups still existed. The  $R_{\text{CHE}}$  in rural households with hospitalized members  
31 in three years were all more than 34% after reimbursement, which meant that many  
32 households still faced CHE even though they were covered with NCMS. To further  
33 prevent CHE, NCMS should increase financing level to provide a better benefit  
34 package, make preferential policies for the high-risk populations, properly expand  
35 catalogue of essential medicines and increase reimbursement rates and establish  
36 effective supervision system. A high-quality health care in China will contribute to  
37 global health because of China's great population share in the world. Undoubtedly, the  
38 gain and loss during this reform will serve as reference for other countries, especially  
39 developing countries.

## 40 41 42 43 44 45 46 47 48 49 50 51 52 53 54 55 56 **Acknowledgment**

1  
2  
3 The research is funded by National Natural Science Foundation of China [81273183  
4 to Liu MN].  
5  
6  
7  
8

9 **Contributors**

10 XB, W-ZQ and H-MH drafted the manuscript. C-YJ and FR performed data collection  
11 and statistical analyses. L-MN and MQ made a substantial contribution to the  
12 interpretation of the data and study design. All authors read and approved the final  
13 manuscript.  
14  
15  
16  
17  
18

19  
20 **Competing interests:** None declared.  
21  
22  
23

24 **Ethics approval :** The institutional review board of the Chinese National Bureau of  
25 Statistics provided review and ethics approval of the survey.  
26  
27  
28

29  
30 **Data sharing statement:** Original data is available on request. It was stored on  
31 password-protected computers at the centre for health statistics information of  
32 Ministry of Health in Beijing, China.  
33  
34  
35  
36  
37  
38  
39  
40  
41  
42  
43  
44  
45  
46  
47  
48  
49  
50  
51  
52  
53  
54  
55  
56  
57  
58  
59  
60

## References

1. Xu K. Distribution of health payments and catastrophic expenditures methodology. Geneva: Department of Health System Financing, WHO; 2005.
2. New Cooperative Medical Scheme in 2011. Ministry of Health of the People's Republic of China; 2012.
3. Meng Q, Xu L, Zhang Y, et al. Trends in access to health services and financial protection in China between 2003 and 2011: a cross-sectional study. *Lancet* 2012;379:805–814.
4. Li Y, Wu Q, Liu C, et al. Catastrophic health expenditure and rural household impoverishment in China: what role does the new cooperative health insurance scheme play. *PLoS One* 2014;9:e93253.
5. Sun YL, Xu LZ. The equity research of health service among urban and rural different professions residents in WeiHai. *Chinese Health Service Management* 2007;23:584–586.
6. Wu B. Dental service utilization among urban and rural older adults in China – a brief communication. *J Public Health Dent* 2007;67:185–188.
7. Liang QJ, Zhang XY, Shen X. The equity of health service utilization among urban and rural residents in China. *Health Economics Research* 2010;5:26–28.
8. Zhang ZG, Huang L. Research on the disparity and equalization between city and countryside of basic medical safeguard in China. *Reformation & Strategy* 2011;27:176–179.
9. Hong LJ. Analysis of regional balance in maternal and children health services utilization and its change in China. AnHui, HeFei: AnHui Medical University; 2011.
10. Wang Q, Liu H, Lu ZX, et al. Role of the new rural cooperative medical system in alleviating catastrophic medical payments for hypertension, stroke and coronary heart disease in poor rural areas of China. *BMC Public Health* 2014;14:907.
11. Analysis report of national health services survey in China, 2008. Beijing: Center for Health Statistics and Information, Ministry of Health China; 2009.

- 1
  - 2
  - 3
  - 4
  - 5
  - 6
  - 7
  - 8
  - 9
  - 10
  - 11
  - 12
  - 13
  - 14
  - 15
  - 16
  - 17
  - 18
  - 19
  - 20
  - 21
  - 22
  - 23
  - 24
  - 25
  - 26
  - 27
  - 28
  - 29
  - 30
  - 31
  - 32
  - 33
  - 34
  - 35
  - 36
  - 37
  - 38
  - 39
  - 40
  - 41
  - 42
  - 43
  - 44
  - 45
  - 46
  - 47
  - 48
  - 49
  - 50
  - 51
  - 52
  - 53
  - 54
  - 55
  - 56
  - 57
  - 58
  - 59
  - 60
12. Xu L, Wang Y, Collins CD, et al. Urban health insurance reform and coverage in China using data from National Health Services surveys in 1998 and 2003. *BMC Health Serv Res* 2007;7:37.
13. Wagstaff A, van Doorslaer E. Catastrophe and impoverishment in paying for health care: with applications to Vietnam 1993-1998. *Health Econ* 2003;12:921-34.
14. Lindelow M, Wagstaff A. Health shocks in China: are the poor and uninsured less protected? World Bank. *Policy Research Working Paper* 2005:3740.
15. Shanlian H, Shenglan T, Yuanli L, et al. Reform of how health care is paid for in China: challenges and opportunities. *Lancet* 2008;372:1846-53.
16. Liu Y, Rao K, Hsiao WC. Medical expenditure and rural impoverishment in China. *J Health Popul Nutr* 2003;21:216-22.
17. China Statistical Yearbook Beijing: China Statistical Press; 2009.
18. National Bureau of Statistics of China National Economic and Social Development Statistics Bulletin in 2011; 2012.
19. Xu K, Evans DB, Carrin G, et al. Protecting households from catastrophic health spending. *Health Aff (Millwood)* 2007;26:972-83.
20. Yardim MS, Cilingiroglu N, Yardim N. Catastrophic health expenditure and impoverishment in Turkey. *Health Policy* 2010;94:26-33.
21. Somkotra T, Lagrada LP. Which households are at risk of catastrophic health spending: Experience in Thailand after universal coverage. *Health Affairs* 2009;28:467-478.
22. Li Y, Chi I, Zhang K, et al. Comparison of health services use by Chinese urban and rural older adults in Yunnan province. *Geriatr Gerontol Int* 2006;6:260-269.
23. Xu K, Evans DB, Kawabata K, et al. Household catastrophic health expenditure: a multicountry analysis. *Lancet* 2003;362:111-7.
24. Su TT, Kouyate B, Flessa S. Catastrophic household expenditure for health care in a low-income society: a study from Nouna District, Burkina Faso. *Bull World Health Organ* 2006;84:21-7.

- 1
- 2
- 3 25. Waters HR, Anderson GF, Mays J. Measuring financial protection in health in
- 4 the United States. *Health Policy* 2004;69:339-49.
- 5
- 6
- 7 26. Kawabata K, Xu K, Carrin G. Preventing impoverishment through protection
- 8 against catastrophic health expenditure. *Bull World Health Organ*
- 9 2002;80:612.
- 10
- 11
- 12 27. Tangcharoensathien V, Patcharanarumol W. Health-financing reforms in
- 13 Southeast Asia: challenges in achieving universal coverage. *Lancet* 2011;377:
- 14 863–873.
- 15
- 16
- 17 28. Flores G, Krishnakumar J, O'Donnell O, et al. Coping with health-care costs:
- 18 implications for the measurement of catastrophic expenditures and poverty.
- 19 *Health Econ* 2008;17:1393-412.
- 20
- 21
- 22 29. Zhao H. The significance of the new rural cooperative medical scheme for
- 23 China. *Theory Invest* 2007;5:107–109.
- 24
- 25
- 26 30. Zeger SL, Liang KY. Longitudinal data analysis for discrete and continuous
- 27 outcomes. *Biometrics* 1986;42:121–130.
- 28
- 29
- 30
- 31
- 32
- 33
- 34
- 35
- 36
- 37
- 38
- 39
- 40
- 41
- 42
- 43
- 44
- 45
- 46
- 47
- 48
- 49
- 50
- 51
- 52
- 53
- 54
- 55
- 56
- 57
- 58
- 59
- 60



### Supplementary data 1 The questions in the questionnaire of NHSS employed to calculate indicators

Food consumption expenditure in each household was measured by the question, “How much did your household spend in food consumption expenditure during the last one year?”

The question, “How much did your household spend in living expenditure during the last one year?” was chosen to measure the total living expenditure in each household.

Actual household size was measured by the question, “How many people have a long-term residence at your household?”

The question, “How much did your household spend in medical expenses (without compensations from a third party) during the last one year” was chosen to measure the out-of-pocket health expenditure payment in each household.

### Supplementary data 2

**Table 1 Determinants of catastrophic health expenditure.**

| Determinant                                                    | $\beta$ (95%CI)    | SE   | Z     | P      |
|----------------------------------------------------------------|--------------------|------|-------|--------|
| <b>Gender of householder</b> (male vs female)                  | -0.51(-0.62--0.40) | 0.06 | -8.94 | <.0001 |
| <b>Age of householder</b>                                      | 0.28(0.11-0.46)    | 0.09 | 3.12  | 0.0018 |
| <b>Educational level of householder</b>                        |                    |      |       |        |
| Elementary school vs Illiterate                                | -0.35(-0.48--0.22) | 0.07 | -5.31 | <.0001 |
| Junior high school vs Illiterate                               | -0.49(-0.64--0.35) | 0.07 | -6.84 | <.0001 |
| Senior high school or above vs Illiterate                      | -0.90(-1.11--0.70) | 0.11 | -8.56 | <.0001 |
| <b>One or more members older than 60 years</b><br>(yes vs no)  | 0.39(0.21-0.56)    | 0.09 | 4.35  | <.0001 |
| <b>One or more members younger than 5 years</b><br>(yes vs no) | 0.03(-0.11-0.17)   | 0.07 | 0.37  | 0.7104 |
| <b>Number of household members</b>                             | -0.27(-0.31--0.24) | 0.02 | -14.3 | <.0001 |
| <b>Years</b>                                                   |                    |      |       |        |
| 2008 vs 2003                                                   | -0.27(-0.59-0.06)  | 0.17 | -1.62 | 0.1057 |
| 2013 vs 2003                                                   | -0.28(-0.60-0.04)  | 0.16 | -1.71 | 0.0877 |

**STROBE 2007 (v4) checklist of items to be included in reports of observational studies in epidemiology\***  
**Checklist for cohort, case-control, and cross-sectional studies (combined)**

| Section/Topic             | Item # | Recommendation                                                                                                                                                                                                                                                                                                                                                                                                                                                         | Reported on page # |
|---------------------------|--------|------------------------------------------------------------------------------------------------------------------------------------------------------------------------------------------------------------------------------------------------------------------------------------------------------------------------------------------------------------------------------------------------------------------------------------------------------------------------|--------------------|
| Title and abstract        | 1      | (a) Indicate the study's design with a commonly used term in the title or the abstract                                                                                                                                                                                                                                                                                                                                                                                 | 1-2                |
|                           |        | (b) Provide in the abstract an informative and balanced summary of what was done and what was found                                                                                                                                                                                                                                                                                                                                                                    | 2                  |
| <b>Introduction</b>       |        |                                                                                                                                                                                                                                                                                                                                                                                                                                                                        |                    |
| Background/rationale      | 2      | Explain the scientific background and rationale for the investigation being reported                                                                                                                                                                                                                                                                                                                                                                                   | 4                  |
| Objectives                | 3      | State specific objectives, including any pre-specified hypotheses                                                                                                                                                                                                                                                                                                                                                                                                      | 4,5                |
| <b>Methods</b>            |        |                                                                                                                                                                                                                                                                                                                                                                                                                                                                        |                    |
| Study design              | 4      | Present key elements of study design early in the paper                                                                                                                                                                                                                                                                                                                                                                                                                | 5-7                |
| Setting                   | 5      | Describe the setting, locations, and relevant dates, including periods of recruitment, exposure, follow-up, and data collection                                                                                                                                                                                                                                                                                                                                        | 5                  |
| Participants              | 6      | (a) <i>Cohort study</i> —Give the eligibility criteria, and the sources and methods of selection of participants. Describe methods of follow-up<br><i>Case-control study</i> —Give the eligibility criteria, and the sources and methods of case ascertainment and control selection. Give the rationale for the choice of cases and controls<br><i>Cross-sectional study</i> —Give the eligibility criteria, and the sources and methods of selection of participants | 5-6                |
|                           |        | (b) <i>Cohort study</i> —For matched studies, give matching criteria and number of exposed and unexposed<br><i>Case-control study</i> —For matched studies, give matching criteria and the number of controls per case                                                                                                                                                                                                                                                 |                    |
| Variables                 | 7      | Clearly define all outcomes, exposures, predictors, potential confounders, and effect modifiers. Give diagnostic criteria, if applicable                                                                                                                                                                                                                                                                                                                               | 5-7                |
| Data sources/ measurement | 8*     | For each variable of interest, give sources of data and details of methods of assessment (measurement). Describe comparability of assessment methods if there is more than one group                                                                                                                                                                                                                                                                                   | 5                  |
| Bias                      | 9      | Describe any efforts to address potential sources of bias                                                                                                                                                                                                                                                                                                                                                                                                              | 5                  |
| Study size                | 10     | Explain how the study size was arrived at                                                                                                                                                                                                                                                                                                                                                                                                                              | 5                  |
| Quantitative variables    | 11     | Explain how quantitative variables were handled in the analyses. If applicable, describe which groupings were chosen and why                                                                                                                                                                                                                                                                                                                                           | 6-7                |
| Statistical methods       | 12     | (a) Describe all statistical methods, including those used to control for confounding                                                                                                                                                                                                                                                                                                                                                                                  | 6-7                |
|                           |        | (b) Describe any methods used to examine subgroups and interactions                                                                                                                                                                                                                                                                                                                                                                                                    | 6-7                |
|                           |        | (c) Explain how missing data were addressed                                                                                                                                                                                                                                                                                                                                                                                                                            | 5                  |
|                           |        | (d) <i>Cohort study</i> —If applicable, explain how loss to follow-up was addressed<br><i>Case-control study</i> —If applicable, explain how matching of cases and controls was addressed                                                                                                                                                                                                                                                                              |                    |

|                          |     |                                                                                                                                                                                                              |           |
|--------------------------|-----|--------------------------------------------------------------------------------------------------------------------------------------------------------------------------------------------------------------|-----------|
|                          |     | <i>Cross-sectional study</i> —If applicable, describe analytical methods taking account of sampling strategy                                                                                                 | 5         |
|                          |     | (e) Describe any sensitivity analyses                                                                                                                                                                        |           |
| <b>Results</b>           |     |                                                                                                                                                                                                              |           |
| Participants             | 13* | (a) Report numbers of individuals at each stage of study—eg numbers potentially eligible, examined for eligibility, confirmed eligible, included in the study, completing follow-up, and analysed            | 5         |
|                          |     | (b) Give reasons for non-participation at each stage                                                                                                                                                         | 5         |
|                          |     | (c) Consider use of a flow diagram                                                                                                                                                                           |           |
| Descriptive data         | 14* | (a) Give characteristics of study participants (eg demographic, clinical, social) and information on exposures and potential confounders                                                                     | 8-9       |
|                          |     | (b) Indicate number of participants with missing data for each variable of interest                                                                                                                          |           |
|                          |     | (c) <i>Cohort study</i> —Summarise follow-up time (eg, average and total amount)                                                                                                                             |           |
| Outcome data             | 15* | <i>Cohort study</i> —Report numbers of outcome events or summary measures over time                                                                                                                          |           |
|                          |     | <i>Case-control study</i> —Report numbers in each exposure category, or summary measures of exposure                                                                                                         |           |
|                          |     | <i>Cross-sectional study</i> —Report numbers of outcome events or summary measures                                                                                                                           | 5         |
| Main results             | 16  | (a) Give unadjusted estimates and, if applicable, confounder-adjusted estimates and their precision (eg, 95% confidence interval). Make clear which confounders were adjusted for and why they were included | 14-15     |
|                          |     | (b) Report category boundaries when continuous variables were categorized                                                                                                                                    |           |
|                          |     | (c) If relevant, consider translating estimates of relative risk into absolute risk for a meaningful time period                                                                                             |           |
| Other analyses           | 17  | Report other analyses done—eg analyses of subgroups and interactions, and sensitivity analyses                                                                                                               | 10-15     |
| <b>Discussion</b>        |     |                                                                                                                                                                                                              |           |
| Key results              | 18  | Summarise key results with reference to study objectives                                                                                                                                                     | 15-18     |
| Limitations              | 19  | Discuss limitations of the study, taking into account sources of potential bias or imprecision. Discuss both direction and magnitude of any potential bias                                                   | 3         |
| Interpretation           | 20  | Give a cautious overall interpretation of results considering objectives, limitations, multiplicity of analyses, results from similar studies, and other relevant evidence                                   | 3 , 15-18 |
| Generalisability         | 21  | Discuss the generalisability (external validity) of the study results                                                                                                                                        | 3         |
| <b>Other information</b> |     |                                                                                                                                                                                                              |           |
| Funding                  | 22  | Give the source of funding and the role of the funders for the present study and, if applicable, for the original study on which the present article is based                                                | 19        |

\*Give information separately for cases and controls in case-control studies and, if applicable, for exposed and unexposed groups in cohort and cross-sectional studies.

**Note:** An Explanation and Elaboration article discusses each checklist item and gives methodological background and published examples of transparent reporting. The STROBE checklist is best used in conjunction with this article (freely available on the Web sites of PLoS Medicine at <http://www.plosmedicine.org/>, Annals of Internal Medicine at <http://www.annals.org/>, and Epidemiology at <http://www.epidem.com/>). Information on the STROBE Initiative is available at [www.strobe-statement.org](http://www.strobe-statement.org).

# BMJ Open

## Impact of New Cooperative Medical Scheme on the Trend of Catastrophic Health Expenditure in Chinese Rural Households: results from nationally representative surveys from 2003 to 2013

|                                 |                                                                                                                                                  |
|---------------------------------|--------------------------------------------------------------------------------------------------------------------------------------------------|
| Journal:                        | <i>BMJ Open</i>                                                                                                                                  |
| Manuscript ID                   | bmjopen-2017-019442.R1                                                                                                                           |
| Article Type:                   | Research                                                                                                                                         |
| Date Submitted by the Author:   | 01-Dec-2017                                                                                                                                      |
| Complete List of Authors:       | Xie, Biao<br>Huo, Minghe<br>Wang, Zhiqiang; University of Queensland, School of Medicine<br>Chen, Yongjie<br>Fu, Rong<br>Liu, Meina<br>Meng, Qun |
| <b>Primary Subject Heading</b>: | Health services research                                                                                                                         |
| Secondary Subject Heading:      | Health services research, Health policy, Health economics                                                                                        |
| Keywords:                       | CHE, rural households with hospitalized members, NCMS, NHSS                                                                                      |
|                                 |                                                                                                                                                  |

SCHOLARONE™  
Manuscripts

Only

1  
2  
3  
4  
5  
6  
7  
8  
9  
10  
11  
12  
13  
14  
15  
16  
17  
18  
19  
20  
21  
22  
23  
24  
25  
26  
27  
28  
29  
30  
31  
32  
33  
34  
35  
36  
37  
38  
39  
40  
41  
42  
43  
44  
45  
46  
47  
48  
49  
50  
51  
52  
53  
54  
55  
56  
57  
58  
59  
60

1           **Impact of New Cooperative Medical Scheme on the Trend of**  
2           **Catastrophic Health Expenditure in Chinese Rural Households:**  
3           **results from nationally representative surveys from 2003 to 2013**

5           Biao Xie<sup>1</sup> PHD, Minghe Huo<sup>2</sup> PHD, Zhiqiang Wang<sup>3</sup> PHD, Yongjie Chen<sup>1</sup> PHD, Rong Fu<sup>4</sup> PHD,

6           Meina Liu<sup>1\*</sup> PHD, Qun Meng<sup>2\*</sup> PHD

7           <sup>1</sup>Department of Biostatistics, Public Health College, Harbin Medical University, Harbin City,

8           Heilongjiang Province, China.

9           <sup>2</sup>Department of Health management, Public Health College, Harbin Medical University, Harbin

10          City, Heilongjiang Province, China.

11          <sup>3</sup>School of Medicine, the University of Queensland, Room 817, Health Sciences Building, Royal

12          Brisbane & Women's Hospital, Herston QLD, Australia.

13          <sup>4</sup>Department of Epidemiology and Biostatistics, Public Health College, Fujian Medical University,

14          Fuzhou City, Fujian Province, China.

15          \*Correspondence author: [liumeina369@163.com](mailto:liumeina369@163.com) and [mengqun@nhfpc.gov.cn](mailto:mengqun@nhfpc.gov.cn) Fax:

16          +86+(0451)87502680, Telephone Number: +86+(0451)87502680

1  
2  
3  
4  
5  
6  
7  
8  
9  
10  
11  
12  
13  
14  
15  
16  
17  
18  
19  
20  
21  
22  
23  
24  
25  
26  
27  
28  
29  
30  
31  
32  
33  
34  
35  
36  
37  
38  
39  
40  
41  
42  
43  
44  
45  
46  
47  
48  
49  
50  
51  
52  
53  
54  
55  
56  
57  
58  
59

## 29 Abstract

30 **Objective** To evaluate the trend of catastrophic health expenses (CHE) for inpatient  
31 care in relation to the commencement of New Cooperative Medical Scheme (NCMS)  
32 in rural China from 2003 to 2013 and the roles of NCMS in protecting affected  
33 households from CHE.

34 **Methods** We assessed 10-year trend of the incidence and severity of CHE in rural  
35 households with hospitalized members using the data from Chinese National Health  
36 Services Survey (NHSS). Generalized Estimating Equations (GEE) were used to  
37 estimate the odds ratio (OR) and 95% confidence interval (CI) for the association  
38 between incidence rates of CHE ( $R_{CHE}$ ) and NCMS reimbursement.

39 **Results** The incidence and severity of CHE after NCMS reimbursement both  
40 decreased and their changes increased rapidly from 2003 to 2013. After adjustment of  
41 the covariates, the  $R_{CHE}$  before reimbursement was significantly higher than that after  
42 reimbursement and the OR (95% CI) was 1.50(1.24-1.81), 1.79(1.69-1.90) and  
43 2.94(2.77-3.11) in the year of 2003, 2008 and 2013, respectively.

44 **Conclusion** The incidence and severity of CHE both reduced after NCMS  
45 reimbursements in each year. Excluding some confounding factors,  $R_{CHE}$  was  
46 significantly associated with NCMS reimbursement. The NCMS partly protected the  
47 rural households with hospitalized members from CHE. However, the inequalities  
48 between different income groups still existed. The  $R_{CHE}$  in rural households with  
49 hospitalized members were still rather high in 2003, 2008 and 2013 even though they  
50 were covered with NCMS. This study will provide suggestions for further reforms in  
51 China and guidance for other developing countries.

52  
53 **Keywords** CHE; rural households with hospitalized members; NCMS; NHSS.  
54  
55  
56  
57  
58  
59

1  
2  
3  
4  
5  
6  
7  
8  
9  
10  
11  
12  
13  
14  
15  
16  
17  
18  
19  
20  
21  
22  
23  
24  
25  
26  
27  
28  
29  
30  
31  
32  
33  
34  
35  
36  
37  
38  
39  
40  
41  
42  
43  
44  
45  
46  
47  
48  
49  
50  
51  
52  
53  
54  
55  
56  
57  
58  
59  
60

60 **Strengths and limitations of this study**

- 61 ▶ Generalized Estimating Equations (GEE) were used to estimate OR and 95% CI
- 62 for the association between the catastrophe's incidence and NCMS
- 63 reimbursement.
- 64 ▶ We assessed 10-year trend of the incidence and severity of CHE at national level
- 65 using the data from the Chinese National Health Services Survey (NHSS).
- 66 ▶ Three indicators were used to capture the catastrophe's incidence and intensity.
- 67 ▶ The sample size in 2003 was small with only 180 households.

1  
2  
3 894 90 **Introduction**

5  
6 91 The New Cooperative Medical System (NCMS) was introduced to rural China in  
7  
8 92 2003. It was designed to provide financial protection for its enrollees. In terms of the  
9  
10 93 enrollment size, NCMS is by far the largest health insurance plan in the world.<sup>1</sup>  
11  
12 94 Catastrophic health expenses (CHE) is defined as an out-of-pocket health expenditure  
13  
14 95 which is larger than 40% of the household's capacity to pay (CTP).<sup>2</sup> CHE is an  
15  
16 96 indicator reflecting the effectiveness of financial protection a health insurance could  
17  
18 97 provide for its members. In 2008, 15.1% of the rural households and 35.0% of the  
19  
20 98 rural households with hospitalized members faced CHE in China.<sup>3 4</sup> It was essential to  
21  
22 99 evaluate the role of NCMS in preventing CHE among its members. There had been  
23  
24 100 many studies measuring the impact of NCMS. However, most studies focused on a  
25  
26 101 specific local area or the short-term effect of NCMS on CHE in China.<sup>3-10</sup> NCMS  
27  
28 102 focused on inpatient care reimbursement. Among studies on the impact of NCMS on  
29  
30 103 CHE, those focusing on affected rural households with hospitalized members were  
31  
32 104 valuable. However, few previous studies had focused on such affected rural  
33  
34 105 households.

35  
36 106 We assessed 10-year trend of the incidence and severity of CHE in rural  
37  
38 107 households with hospitalized members at national level using the data from the  
39  
40 108 Chinese National Health Services Survey (NHSS). The trend of CHE for inpatient  
41  
42 109 care in relation to the commencement of NCMS in rural China from 2003 to 2013 and  
43  
44 110 the roles of NCMS in protecting affected households from CHE can provide evidence  
45  
46 111 for NCMS in improving the financial protection for Chinese residents. As an  
47  
48 112 exploratory attempt to study the impact of NCMS on CHE of rural households with  
49  
50 113 hospitalized members, this study can provide some recommendations for the next  
51  
52 114 phase of health reform for policy-makers.

53 115  
54 116  
55 117  
56 118  
57 119



1  
2  
3 120

4 121

5  
6 122 **Method**7  
8 123 **Data source and study population**

9 124 Data used in this study was derived from the Chinese third NHSS in 2003, the fourth

10 125 NHSS in 2008 and the fifth NHSS in 2013. As the largest statewide health survey in

11 126 China, the NHSS was organized by the Chinese government every 5 years since 1993.

12 127 All data in NHSS was collected using a structured questionnaire, whose validity and

13 128 reliability had been demonstrated.<sup>11 12</sup> The NHSS was done with a robust multi-stage14 129 and stratified random cluster sampling method.<sup>13</sup> A total of 94 counties were selected

15 130 from 2859 counties in 31 provinces, autonomous regions, and municipalities in China.

16 131 In each county, five townships were selected within which two villages were selected.

17 132 A total of 470 townships and 940 villages were included. In each village, 60

18 133 households were selected.<sup>14</sup> The institutional review board of the Chinese National

19 134 Bureau of Statistics provided review and ethics approval of the survey. A district

20 135 survey manager checked the questionnaires at the end of each day to avoid missing

21 136 information or logic errors. 5% of the sampled households were randomly selected to

22 137 be revisited to examine survey quality (95% was achieved).<sup>13</sup> According to a test

23 138 conducted by the Health Statistical Center of the Ministry of Health of China, the

24 139 survey data was representative of structure of overall national population compared

25 140 with the 2007 National Sampling Survey of Population Change.<sup>13</sup>

26 141 This study focused on the incidence and severity of CHE of rural households

27 142 with hospitalized members covered by NCMS. Households which didn't join NCMS

28 143 or didn't use inpatient services were not covered. This yielded a final sample of 6975

29 144 households which experienced inpatient care during the study period (180 in 2003,

30 145 2326 in 2008 and 4469 in 2013).

31 146 **The introduction of indicators**

32 147 Out-of-pocket health expenditure payment (OOP) refers to the expenditure made by

33 148 each household member after they receive health services without compensations

34 149 from a third party. The poverty line is the average food expenditure of households of

1  
2  
3 150 which food share is in the 45th to 55th percentile range. This poverty line multiplied  
4 151 by the equalized household size (actual household size<sup>0.56</sup>) is household subsistence  
5  
6 152 spending. CTP is generally defined as a non-subsistence spending. However, when  
7  
8 153 food expenditure is lower than subsistence spending in some households, the  
9  
10 154 non-food expenditure is used as non-subsistence spending in this particular situation.<sup>1</sup>  
11 155 <sup>4</sup> The information on the questions in the questionnaire of NHSS employed to  
12  
13 156 calculate indicators below were showed in Supplementary information.

14  
15 157 (1) The incidence rates of CHE

16 158 There were various definitions of CHE, we employed the method recommended by  
17  
18 159 World Health Organization (WHO) for calculating CHE in this study. An OOP is  
19  
20 160 considered financially catastrophic when it is larger than 40% of the household's  
21  
22 161 CTP.<sup>1</sup> Let  $R_{\text{CHE}}$  denotes the incidence rates of CHE, which can be calculated as

$$123 \quad 162 \quad R_{\text{CHE}} = \frac{1}{N} \sum_{i=1}^N E_i \quad (1)$$

24  
25  
26  
27 163 Where  $N$  represents the sample size.  $E_i = 1$  when  $\text{OOP}/\text{CTP} \geq 0.4$ ;  $E_i = 0$  when  
28  
29 164  $\text{OOP}/\text{CTP} < 0.4$ .

30  
31 165 (2) The definitions and calculations of mean CHE gap ( $G_{\text{CHE}}$ ) and mean positive CHE  
32  
33 166 gap ( $\text{MPG}_{\text{CHE}}$ )

34  
35 167 The  $G_{\text{CHE}}$  describes how much of a household's health expenditure is in excess of the  
36  
37 168 threshold of 40% of its CTP, which is estimated to reveal the average level of CHE  
38  
39 169 severity for all studied households. The  $\text{MPG}_{\text{CHE}}$  refers to the average of the sum of the  
40  
41 170 total excesses from all the catastrophic households in the sample.<sup>1</sup>  $G_{\text{CHE}}$  and  $\text{MPG}_{\text{CHE}}$   
42  
43 171 can be calculated as

$$44 \quad 45 \quad 172 \quad G_{\text{CHE}} = \frac{1}{N} \sum_{i=1}^N O_i \quad (2)$$

$$46 \quad 47 \quad 48 \quad 49 \quad 173 \quad \text{MPG}_{\text{CHE}} = \frac{\sum_{i=1}^N O_i}{\sum_{i=1}^N E_i} \quad (3)$$

50  
51  
52  
53 174 Where  $O_i = \text{OOP}/\text{CTP} - 0.4$  when  $\text{OOP}/\text{CTP} > 0.4$ ;  $O_i = 0$  when  $\text{OOP}/\text{CTP} \leq 0.4$ .

## 175 **The introduction of Generalized Estimating Equations (GEE)**

176 GEE is based on the quasi-likelihood function and generalized linear model. It can be  
177 used to resolve repeated measures issues.<sup>15-17</sup> GEE has the following advantages:

178 (1) More robust modeling. When connectivity function of GEE is correct, we can  
179 get stable parameter estimates even if the correlation matrix is chosen  
180 randomly;

181 (2) Flexibility. Dependent variable of GEE can follow any kind of exponential  
182 distribution. Various covariance structures can also be chosen.<sup>15-17</sup>

183 In this study, the  $R_{\text{CHE}}$  of each household had two records, one before NCMS  
184 reimbursement and one after. We took it as a repeated measures analysis. Dependent  
185 and independent variable is the prevalence status of CHE and reimbursement status  
186 of NCMS, respectively. We performed GEE with logit link to estimate OR and 95%  
187 CI for the association between the  $R_{\text{CHE}}$  and NCMS reimbursement.

### 188 **Statistical analysis**

189 Categorical variables and expenditure measures were described by numbers  
190 (percentages) and means (standard deviation), respectively. Annual household income  
191 in 2008 and 2013 was transformed by Consumer Price Index (CPI) to the price level  
192 in 2003 with the transformation formula: real price=nominal price  $\times$  (CPI of base  
193 year/CPI of object year).<sup>18</sup> Annual household income was classified as quartiles.  
194 Three indicators above captured the catastrophe's incidence and intensity. We used  
195 stratification analysis to assess the 10-year trend of these indicators before and after  
196 NCMS reimbursement. The impact of NCMS in each year was reflected in the  
197 difference in CHE before and after reimbursement. The trend of difference from 2003  
198 to 2013 reflected overall change of the impact of NCMS. Data was disaggregated by  
199 three geographic regions (east, central and west) and four household income levels.  
200 The  $R_{\text{CHE}}$  of each household had two records in each year, one before NCMS  
201 reimbursement and one after. We took it as a repeated measures analysis. GEE was  
202 used to estimate OR and 95% CI for the association between the  $R_{\text{CHE}}$  and NCMS

1  
2  
3  
4 203 reimbursement. Covariates including age, gender, education level, employment and  
5  
6 204 marital status of household head, household size, one or more members younger than  
7  
8 205 5 years and one or more members older than 60 years were adjusted. All of the  
9  
10 206 analyses were performed using SAS 9.2 (SAS Institute Inc., Cary, NC, USA). A  
11  
12 207 two-sided  $P < 0.05$  was established as the level of statistical significance for all tests.

13 208

## 14 209 **Result**

### 15 210 **Characteristics of Households**

16 211 Characteristics of all households enrolled in the study in 2003, 2008 and 2013 were  
17  
18 212 shown in Table 1. The age of householders increased from 2003 to 2013, 49.38% of  
19  
20 213 the householders were of age 60 or older in 2013. The proportion of households with  
21  
22 214 one or more members younger than 5 years decreased from 17.78% in 2003 to 14.84%  
23  
24 215 in 2013. The proportion of households with people of age 60 or older showed a 12.96%  
25  
26 216 increase from 2003 to 2013. The proportion of householders with a junior high school  
27  
28 217 or higher degree increased from 31.67% in 2003 to 40.17% in 2013. Annual  
29  
30 218 household income of each year was divided into quartiles, with each quartile cutoffs  
31  
32 219 shifting upward from 2003 to 2013.

### 33 220 **The incidence rates of CHE**

34  
35 221 Table 2 showed the  $R_{CHE}$  among all the studied households. After NCMS  
36  
37 222 reimbursement, the total  $R_{CHE}$  decreased rapidly, from 49.44% in 2003 to 34.88% in  
38  
39 223 2013. The change of the total  $R_{CHE}$  before and after reimbursement increased rapidly,  
40  
41 224 from 9.45% in 2003 to 24.10% in 2013. A similar pattern was observed in different  
42  
43 225 regions and different income levels. In addition, the poorest had the highest incidence  
44  
45 226 and the change in the west region was bigger than those in other regions.

### 46 227 **The Severity of CHE**

47  
48 228 The severity of CHE among all the studied households was shown in Table 3. After  
49  
50 229 NCMS reimbursement, the total  $G_{CHE}$  exhibited a decreased trend, from 12.57% in  
51  
52 230 2003 to 8.15% in 2013. The change of the total  $G_{CHE}$  before and after reimbursement  
53  
54 231 increased rapidly from 8.94% in 2003 to 33.50% in 2013. Different regions and

1  
2  
3  
4 232 different income levels had similar patterns. In addition, the highest  $G_{CHE}$  was observed  
5  
6 233 in the poorest areas. A similar trend could be observed in  $MPG_{CHE}$ . The change of  
7  
8 234  $MPG_{CHE}$  was higher than that of  $G_{CHE}$  in each year.

### 9 235 **The influence of NCMS on the incidence rates of CHE**

10  
11 236 Table 4 showed the influence of NCMS on  $R_{CHE}$ . In the aggregate, the  $R_{CHE}$  before  
12  
13 237 NCMS reimbursement was significantly higher than that after NCMS reimbursement  
14  
15 238 and the OR (95% CI) was 1.46(1.23-1.74), 1.70(1.61-1.80) and 2.68(2.54-2.83) in  
16  
17 239 2003, 2008 and 2013, respectively. The OR changed rapidly. There was a 16.44%  
18  
19 240 increase in the year 2008 compared to 2003 and a 57.65% increase in the year 2013  
20  
21 241 compared to 2008. After adjustment of the covariates, the OR (95% CI) was  
22  
23 242 1.50(1.24-1.81), 1.79(1.69-1.90) and 2.94(2.77-3.11) in 2003, 2008 and 2013,  
24  
25 243 respectively. There was a 19.33% increase in the year 2008 compared to 2003 and a  
26  
27 244 64.25% increase in the year 2013 compared to 2008. A similar pattern was observed  
28  
29 245 in different regions and at different income levels but there were several exceptions in  
30  
31 246 central region and the lowest income groups of 2003 where the  $R_{CHE}$  before NCMS  
32  
33 247 reimbursement was not significantly higher than that after NCMS reimbursements.  
34  
35 248 Among these covariates, the protection factors of the CHE were the male gender of  
36  
37 249 the householder, higher level of education of the householder and bigger household  
38  
39 250 size. The risk factors of the CHE were having one or more members older than 60 and  
40  
41 251 the older age of the householder (Supplementary information).

42  
43

### 44 253 **Discussion**

45  
46 254 According to Chinese NHSS in 1998 and 2003, rural residents' health expenditures  
47  
48 255 grew at an annual rate of 11.48%, which was four times faster than their net income.<sup>18</sup>  
49  
50 256 High healthcare expenses in the absence of financial protection forced these rural  
51  
52 257 households to fall into a difficult circumstance: "It's too difficult to see a doctor, and  
53  
54 258 too expensive to seek health care!"<sup>18</sup> In 2003, 96% of rural households in China  
55  
56 259 lacked medical insurance, and 38% of the sick didn't seek medical attention.<sup>13 18</sup> To

1  
2  
3  
4 260 address this issue, NCMS was introduced to Chinese rural areas in 2003. With great  
5  
6 261 efforts of the government, NCMS had experienced rapid growth in coverage. By 2011,  
7  
8 262 97.5% of the rural population had been covered by NCMS in China.<sup>3 18 19</sup> This had  
9  
10 263 fueled a significantly increased consumption of health services due to previously  
11  
12 264 latent unmet demand. From 2003 to 2008, the inpatient hospital admission rate for  
13  
14 265 rural residents almost doubled.<sup>1 4 18</sup> The  $R_{\text{CHE}}$  of rural households with hospitalized  
15  
16 266 members was much higher than other rural households.<sup>4</sup> It was meaningful to evaluate  
17  
18 267 the effectiveness of NCMS to provide financial protection specifically for these rural  
19  
20 268 households with hospitalized members.

21  
22 269 In our study,  $R_{\text{CHE}}$  of these households before NCMS reimbursement were  
23  
24 270 58.89%, 54.90% and 58.98% for 2003, 2008 and 2013, respectively (Table 2).  
25  
26 271 Approximately 60% of the households would fall into CHE and be susceptible to  
27  
28 272 disease-induced poverty if they were not covered with NCMS in three years. After  
29  
30 273 NCMS reimbursement, the  $R_{\text{CHE}}$  decreased with different degrees, which were lowered  
31  
32 274 to 49.44%, 41.75% and 34.88% for 2003, 2008 and 2013, respectively (Table 2). The  
33  
34 275 total  $G_{\text{CHE}}$  and  $MPG_{\text{CHE}}$  also decreased after NCMS reimbursement (Table 3). The  
35  
36 276 incidence and severity of CHE before NCMS reimbursement were higher than that  
37  
38 277 after NCMS reimbursement in three years, which confirmed the effectiveness of  
39  
40 278 NCMS to reduce CHE. Moreover, after adjustment of the covariates,  $R_{\text{CHE}}$  was  
41  
42 279 significantly associated with NCMS reimbursement ( $P < 0.05$ ) (Table 4). To some  
43  
44 280 extent, the NCMS protected the rural households with hospitalized members from  
45  
46 281 CHE. Inpatient reimbursement rates in rural areas had a remarkable achievement,  
47  
48 282 increasing 7.5 times from 5.8% in 2003 to 43.7% in 2011.<sup>3</sup> The financial protection in  
49  
50 283 rural areas have been steadily improved. An apparent enhancement could be seen in  
51  
52 284 this protective effect from 2003 to 2013, especially after the 2009 Health Care Reform.  
53  
54 285 Having one or more members older than 60 in a household, female gender and older  
55  
56 286 age of the householder, lower level of education of the householder and smaller  
57  
58 287 household size increased the risk of incurring CHE in our study (Supplementary

1  
2  
3  
4 288 information). This was consistent with the previous studies.<sup>4 20-23</sup> The NCMS should  
5  
6 289 make preferential policies for these high-risk populations, such as providing special  
7  
8 290 subsidies, extending the depth and breadth of coverage and providing a better benefit  
9  
10 291 package to them. As with targeted poverty alleviation, targeted CHE alleviation  
11  
12 292 among these populations is needed.

13  
14 293 It was worth noting that the  $R_{\text{CHE}}$  in rural households with hospitalized members  
15  
16 294 in three years were all more than 34% after NCMS reimbursement, which meant that  
17  
18 295 a number of households still faced CHE even though they were covered with NCMS  
19  
20 296 (Table 2). Many studies had shown that CHE was very likely to occur in households  
21  
22 297 with poor economic conditions.<sup>24-27</sup> The rural households with hospitalized members  
23  
24 298 have heavy economic burdens and are likely to fall into such conditions. Thus, our  
25  
26 299 study population tend to have higher proportion of CHE than previously reported in  
27  
28 300 the whole rural households. Another reason for high proportion of CHE in these  
29  
30 301 households is the limited numbers of drugs and treatments included in the scope of  
31  
32 302 NCMS. Under the fee-for-service payment system in China, doctors had strong  
33  
34 303 incentives to prescribe expensive drugs and examinations not included by NCMS.<sup>4</sup>  
35  
36 304 The NCMS needs to increase financial investment to expand its catalogue of essential  
37  
38 305 medicines, especially for medicines which could increase the profits of medical  
39  
40 306 institutions and pharmaceutical factories. An effective monitoring system is needed to  
41  
42 307 restrain oversupply of expensive medical services and ensures that first-line generic  
43  
44 308 medicines are available and preferentially prescribed. Besides, NCMS should increase  
45  
46 309 financing level to provide a better benefit package, such as lowering the deductibles  
47  
48 310 and co-payments, and setting higher reimbursement rates and ceilings. Redesigning  
49  
50 311 cost sharing arrangements and provider payment methods and developing more  
51  
52 312 effective cost control mechanisms are also important.

53  
54 313 We observed that all three indicators declined with the increase of household  
55  
56 314 income in our study (Table 2 and Table 3). Low-income households were more likely  
57  
58 315 to incur CHE than other groups. One of the main reasons is their limited ability to pay



1  
2  
3  
4 316 for non-subsistence spending. These households are likely to fall into CHE, even as a  
5  
6 317 result of low health expenditure. This phenomenon had also been experienced in  
7  
8 318 many developing countries in Asia.<sup>20 27-29</sup> The inequalities of three indicators between  
9  
10 319 different income groups still existed from 2003 to 2013 (Table 2 and Table 3). A  
11  
12 320 higher share of resources from central governments should be allocated to areas with  
13  
14 321 poor economic capacity. The current medical financial assistance scheme (MFA),  
15  
16 322 which was a scheme designed to provide support to the poor households for their  
17  
18 323 CHE, should be further promoted to play a more efficient role in preventing CHE.

19 324 The changes of  $R_{CHE}$  and OR before and after NCMS reimbursement in the west  
20  
21 325 region were larger than the corresponding values in other regions in three years (Table  
22  
23 326 2 and Table 4). A higher share of resources was allocated to west region. Inpatient  
24  
25 327 reimbursement rates of east, central and west geographic regions in 2011 was 46.8%,  
26  
27 328 41.2% and 51.2%, respectively.<sup>3 29</sup> Almost all three indicators after NCMS  
28  
29 329 reimbursement decreased rapidly from 2003 to 2008 but slowed down from 2008 to  
30  
31 330 2013 (Table 2 and Table 3). This is due to the worst health situation in 2003 and the  
32  
33 331 saturated health situation in 2008.<sup>30 31</sup>

34 332 With the establishment of basic medical and health system and the improvement  
35  
36 333 of residents' health consciousness, the demand for medical and health services has  
37  
38 334 increased rapidly. Two-week prevalence rate of residents increased from 18.9% in  
39  
40 335 2008 to 24.1% in 2013, prevalence rate of chronic diseases increased from 24.1% in  
41  
42 336 2008 to 33.1% in 2013 and the rate of resident hospitalization increased by 150% in  
43  
44 337 the last 10 years.<sup>33</sup> Accordingly, medical expenditures have also increased rapidly.<sup>32 33</sup>  
45  
46 338 The financial protection of the NCMS in rural areas faces great challenges. To further  
47  
48 339 prevent CHE, the NCMS should keep in step with the process of improvement of  
49  
50 340 rural medical and health service system and adjust corresponding policies timely.

51 341

## 52 342 **Conclusion**

53  
54 343 The  $R_{CHE}$ ,  $G_{CHE}$  and  $MPG_{CHE}$  all decreased rapidly after NCMS reimbursement and their



1  
2  
3  
4 344 changes increased rapidly from 2003 to 2013. After adjustment of the covariates, the  
5 345  $R_{\text{CHE}}$  after NCMS reimbursement were significantly lower than that before NCMS  
6  
7 346 reimbursements in each year. The NCMS partly protected the rural households with  
8  
9 347 hospitalized members from CHE. The financial protection in rural areas had been  
10  
11 348 steadily improved with the development of NCMS. However, the inequalities between  
12  
13 349 different groups still existed. The  $R_{\text{CHE}}$  in rural households with hospitalized members  
14  
15 350 in three years were all more than 34% after reimbursement, which meant that many  
16  
17 351 households still faced CHE even though they were covered with NCMS. To further  
18  
19 352 prevent CHE, NCMS should increase financing level to provide a better benefit  
20  
21 353 package, make preferential policies for the high-risk populations, properly expand  
22  
23 354 catalogue of essential medicines and increase reimbursement rates and establish  
24  
25 355 effective supervision system. A high-quality health care in China will contribute to  
26  
27 356 global health because of China's great population share in the world. Undoubtedly, the  
28  
29 357 gain and loss during this reform will serve as reference for other countries, especially  
30  
31 358 developing countries.

32 359

### 33 360 **Acknowledgment**

34  
35 361 The research is funded by National Natural Science Foundation of China [81273183  
36  
37 362 to Liu MN].

38  
39 363

### 40 364 **Contributors**

41  
42  
43 365 XB, W-ZQ and H-MH drafted the manuscript. C-YJ and FR performed data collection  
44  
45 366 and statistical analyses. L-MN and MQ made a substantial contribution to the  
46  
47 367 interpretation of the data and study design. All authors read and approved the final  
48  
49 368 manuscript.

50  
51 369

52 370 **Competing interests:** None declared.

53  
54 371

1  
2  
3  
4 372 **Ethics approval:** The institutional review board of the Chinese National Bureau of  
5 373 Statistics provided review and ethics approval of the survey.  
6  
7 374

8  
9 375 **Data sharing statement:** Original data is available on request. It was stored on  
10 376 password-protected computers at the centre for health statistics information of  
11 377 Ministry of Health in Beijing, China.  
12  
13  
14  
15 378

16  
17 379

## 18 380 **References**

- 19  
20 381 1. New Cooperative Medical Scheme in 2011. Ministry of Health of the People's  
21 382 Republic of China; 2012.
- 22  
23 383 2. Xu K. Distribution of health payments and catastrophic expenditures  
24 384 methodology. Geneva: Department of Health System Financing, WHO; 2005.
- 25  
26 385 3. Meng Q, Xu L, Zhang Y, et al. Trends in access to health services and  
27 386 financial protection in China between 2003 and 2011: a cross-sectional study.  
28 387 *Lancet* 2012;379:805–814.
- 29  
30 388 4. Li Y, Wu Q, Liu C, et al. Catastrophic health expenditure and rural household  
31 389 impoverishment in China: what role does the new cooperative health insurance  
32 390 scheme play. *PLoS One* 2014;9:e93253.
- 33  
34 391 5. Sun YL, Xu LZ. The equity research of health service among urban and rural  
35 392 different professions residents in WeiHai. *Chinese Health Service*  
36 393 *Management* 2007;23:584–586.
- 37  
38 394 6. Wu B. Dental service utilization among urban and rural older adults in China –  
39 395 a brief communication. *J Public Health Dent* 2007;67:185–188.
- 40  
41 396 7. Liang QJ, Zhang XY, Shen X. The equity of health service utilization among  
42 397 urban and rural residents in China. *Health Economics Research* 2010;5:26–28.
- 43  
44 398 8. Zhang ZG, Huang L. Research on the disparity and equalization between city  
45 399 and countryside of basic medical safeguard in China. *Reformation & Strategy*  
46 400 2011;27:176–179.

- 1  
2  
3 401 9. Hong LJ. Analysis of regional balance in maternal and children health services  
4 402 utilization and its change in China. AnHui, HeFei: AnHui Medical University;  
5 403 2011.  
6  
7  
8 404 10. Wang Q, Liu H, Lu ZX, et al. Role of the new rural cooperative medical  
9 405 system in alleviating catastrophic medical payments for hypertension, stroke  
10 406 and coronary heart disease in poor rural areas of China. *BMC Public Health*  
11 407 2014;14:907.  
12  
13  
14 408 11. Liu Y, Rao K, Wu J, et al. China's health system performance. *Lancet*  
15 409 2008;372(9653):1914-23.  
16  
17  
18 410 12. Center for Health Statistics and Information. Reports of Nation Health Service  
19 411 Survey Summary. 2004.  
20  
21  
22 412 13. Analysis report of national health services survey in China, 2008. Beijing:  
23 413 Center for Health Statistics and Information, Ministry of Health China; 2009.  
24  
25  
26 414 14. Xu L, Wang Y, Collins CD, et al. Urban health insurance reform and coverage  
27 415 in China using data from National Health Services surveys in 1998 and 2003.  
28 416 *BMC Health Serv Res* 2007;7:37.  
29  
30  
31 417 15. Zeger SL, Liang KY. Longitudinal data analysis for discrete and continuous  
32 418 outcomes. *Biometrics* 1986;42:121-130.  
33  
34  
35 419 16. Zeger SL, Liang KY, Albert P. Models for longitudinal data. A Generalized  
36 420 Estimating Equation Approach. *Biometric* 1988;44(4):1049-1060.  
37  
38  
39 421 17. Zhang H, Min J. A comparative study of GEE and MLM in a related data.  
40 422 *Chinese Journal of Health Statistics* 2012;29(2):214-216.  
41  
42  
43 423 18. National Bureau of Statistics of China National Economic and Social  
44 424 Development Statistics Bulletin in 2011; 2012.  
45  
46  
47 425 19. China Statistical Yearbook Beijing: China Statistical Press; 2009.  
48  
49 426 20. Xu K, Evans DB, Carrin G, et al. Protecting households from catastrophic  
50 427 health spending. *Health Aff (Millwood)* 2007;26:972-83.  
51  
52  
53 428 21. Yardim MS, Cilingiroglu N, Yardim N. Catastrophic health expenditure and  
54 429 impoverishment in Turkey. *Health Policy* 2010;94:26-33.  
55

- 1  
2  
3 430 22. Somkotra T, Lagrada LP. Which households are at risk of catastrophic health  
4 431 spending: Experience in Thailand after universal coverage. *Health Affairs*  
5 432 2009;28:467-478.  
6  
7  
8 433 23. Li Y, Chi I, Zhang K, et al. Comparison of health services use by Chinese  
9 434 urban and rural older adults in Yunnan province. *Geriatr Gerontol Int*  
10 435 2006;6:260-269.  
11  
12  
13 436 24. Xu K, Evans DB, Kawabata K, et al. Household catastrophic health  
14 437 expenditure: a multicountry analysis. *Lancet* 2003;362:111-7.  
15  
16  
17 438 25. Su TT, Kouyate B, Flessa S. Catastrophic household expenditure for health  
18 439 care in a low-income society: a study from Nouna District, Burkina Faso. *Bull*  
19 440 *World Health Organ* 2006;84:21-7.  
20  
21  
22 441 26. Waters HR, Anderson GF, Mays J. Measuring financial protection in health in  
23 442 the United States. *Health Policy* 2004;69:339-49.  
24  
25  
26 443 27. Kawabata K, Xu K, Carrin G. Preventing impoverishment through protection  
27 444 against catastrophic health expenditure. *Bull World Health Organ*  
28 445 2002;80:612.  
29  
30  
31 446 28. Flores G, Krishnakumar J, O'Donnell O, et al. Coping with health-care costs:  
32 447 implications for the measurement of catastrophic expenditures and poverty.  
33 448 *Health Econ* 2008;17:1393-412.  
34  
35  
36 449 29. Zhao H. The significance of the new rural cooperative medical scheme for  
37 450 China. *Theory Invest* 2007;5:107-109.  
38  
39  
40 451 30. Wagstaff A, van Doorslaer E. Catastrophe and impoverishment in paying for  
41 452 health care: with applications to Vietnam 1993-1998. *Health Econ*  
42 453 2003;12:921-34.  
43  
44  
45 454 31. Shanlian H, Shenglan T, Yuanli L, et al. Reform of how health care is paid for  
46 455 in China: challenges and opportunities. *Lancet* 2008;372:1846-53.  
47  
48  
49 456 32. Zhou Z, Su Y, Gao J, et al. Assessing equity of healthcare utilization in rural  
50 457 China: results from nationally representative surveys from 1993 to 2008.  
51 458 *International Journal for Equity in Health* 2013;12(1):34.  
52  
53  
54  
55  
56  
57  
58  
59  
60

459 33. Analysis report of national health services survey in China, 2013. Beijing:  
460 Center for Health Statistics and Information, Ministry of Health China; 2016.

461

462

463

464

465 **Table 1. Characteristics of all households enrolled in the study**

| Characteristics                                     | 2003 (N=180) |       | 2008 (N= 2326) |       | 2013 (N= 4469) |       |
|-----------------------------------------------------|--------------|-------|----------------|-------|----------------|-------|
|                                                     | n            | %     | n              | %     | n              | %     |
| <b>Household characteristics</b>                    |              |       |                |       |                |       |
| Number of household members                         |              |       |                |       |                |       |
| <5                                                  | 128          | 71.11 | 1916           | 82.37 | 3971           | 88.86 |
| ≥5                                                  | 52           | 28.89 | 410            | 17.63 | 498            | 11.14 |
| One or more members older than 60 years             |              |       |                |       |                |       |
| No                                                  | 104          | 57.78 | 1267           | 54.47 | 2003           | 44.82 |
| Yes                                                 | 76           | 42.22 | 1059           | 45.53 | 2466           | 55.18 |
| One or more members younger than 5 years            |              |       |                |       |                |       |
| No                                                  | 148          | 82.22 | 1948           | 83.75 | 3806           | 85.16 |
| Yes                                                 | 32           | 17.78 | 378            | 16.25 | 663            | 14.84 |
| Time spent travelling to the nearest medical center |              |       |                |       |                |       |
| ≤15min                                              | 145          | 80.56 | 1701           | 73.13 | 3532           | 79.03 |
| >15min                                              | 35           | 19.44 | 625            | 26.87 | 937            | 20.97 |
| The number of observations in each region           |              |       |                |       |                |       |
| East                                                | 113          | 62.78 | 626            | 26.91 | 991            | 22.17 |

|                                      |          |          |          |          |          |          |
|--------------------------------------|----------|----------|----------|----------|----------|----------|
| Centre                               | 14       | 7.78     | 759      | 32.63    | 1670     | 37.37    |
| West                                 | 53       | 29.44    | 941      | 40.46    | 1808     | 40.46    |
| Annual household income*             |          |          |          |          |          |          |
| Q 1                                  | 2643.33  | 1265.69  | 3956.52  | 1680.38  | 4785.49  | 2590.40  |
| Q 2                                  | 6914.23  | 1353.25  | 9062.74  | 1247.41  | 13003.64 | 2841.22  |
| Q 3                                  | 13505    | 2716.15  | 14699.42 | 2065.84  | 25958.15 | 5174.25  |
| Q 4                                  | 29194.35 | 10927.31 | 31665.48 | 20295.22 | 61082.23 | 44409.99 |
| <b>householders' characteristics</b> |          |          |          |          |          |          |
| Gender                               |          |          |          |          |          |          |
| Male                                 | 131      | 72.78    | 1796     | 77.21    | 3373     | 75.48    |
| Female                               | 49       | 27.22    | 530      | 22.79    | 1096     | 24.52    |
| Age                                  |          |          |          |          |          |          |
| <60                                  | 120      | 66.67    | 1442     | 61.99    | 2262     | 50.62    |
| ≥60                                  | 60       | 33.33    | 884      | 38.01    | 2207     | 49.38    |
| Marital status                       |          |          |          |          |          |          |
| Unmarried                            | 4        | 2.22     | 47       | 2.02     | 72       | 1.61     |
| Married                              | 155      | 86.11    | 1953     | 83.96    | 3735     | 83.58    |
| Divorced                             | 0        | 0        | 29       | 1.25     | 612      | 13.69    |
| Widow or others                      | 21       | 11.67    | 297      | 12.77    | 50       | 1.12     |
| Education                            |          |          |          |          |          |          |
| Illiterate                           | 52       | 28.89    | 511      | 21.98    | 811      | 18.15    |
| Elementary school                    | 71       | 39.44    | 917      | 39.44    | 1863     | 41.69    |
| Junior high school                   | 48       | 26.67    | 722      | 31.05    | 1418     | 31.73    |
| Senior high school or above          | 9        | 5.00     | 175      | 7.53     | 377      | 8.44     |
| Employment                           |          |          |          |          |          |          |
| Employed                             | 126      | 70.00    | 1817     | 78.12    | 3222     | 72.10    |
| Retired                              | 12       | 6.67     | 60       | 2.58     | 157      | 3.51     |
| Others                               | 42       | 23.33    | 449      | 19.30    | 1090     | 24.39    |

466 \*Annual household income of each year was divided into four levels according to the quartile, the  
 467 mean and standard deviation of each level were calculated.

1  
2  
3  
4  
5  
6  
7  
8  
9  
10  
11  
12  
13  
14  
15  
16  
17  
18  
19  
20  
21  
22  
23  
24  
25  
26  
27  
28  
29  
30  
31  
32  
33  
34  
35  
36  
37  
38  
39  
40  
41  
42  
43  
44  
45  
46  
47

**Table 2. Results of the incidence rates of CHE among all the studied households (%)**

| $R_{CHE}$ | 2003                 |                     |        | 2008                 |                     |        | 2013                 |                     |        |
|-----------|----------------------|---------------------|--------|----------------------|---------------------|--------|----------------------|---------------------|--------|
|           | Before reimbursement | After reimbursement | Change | Before reimbursement | After reimbursement | Change | Before reimbursement | After reimbursement | Change |
| Total     | 58.89                | 49.44               | 9.45   | 54.90                | 41.75               | 13.15  | 58.98                | 34.88               | 24.10  |
| East      | 58.41                | 50.44               | 7.97   | 58.79                | 46.49               | 12.30  | 63.47                | 39.56               | 23.91  |
| Centre    | 85.71                | 85.71               | 0      | 49.54                | 38.47               | 11.07  | 57.13                | 35.51               | 21.62  |
| West      | 52.83                | 37.74               | 15.09  | 56.64                | 41.23               | 15.41  | 58.24                | 31.75               | 26.49  |
| Q1        | 71.11                | 71.11               | 0      | 78.65                | 60.67               | 17.98  | 86.25                | 58.75               | 27.50  |
| Q2        | 60.47                | 48.84               | 11.63  | 59.32                | 44.30               | 15.02  | 73.61                | 43.13               | 30.48  |
| Q3        | 60.87                | 45.65               | 15.22  | 50.93                | 39.22               | 11.71  | 54.79                | 29.16               | 25.63  |
| Q4        | 43.48                | 32.61               | 10.87  | 37.23                | 27.88               | 9.35   | 32.86                | 18.39               | 14.47  |

**Table 3. Results of the severity of CHE among all the studied households (%)**

| Indicators               | 2003                 |                     |        | 2008                 |                     |        | 2013                 |                     |        |
|--------------------------|----------------------|---------------------|--------|----------------------|---------------------|--------|----------------------|---------------------|--------|
|                          | Before reimbursement | After reimbursement | Change | Before reimbursement | After reimbursement | Change | Before reimbursement | After reimbursement | Change |
| <i>G<sub>CHE</sub></i>   |                      |                     |        |                      |                     |        |                      |                     |        |
| Total                    | 21.51                | 12.57               | 8.94   | 23.23                | 10.08               | 13.15  | 41.65                | 8.15                | 33.50  |
| East                     | 19.54                | 13.56               | 5.98   | 28.54                | 12.54               | 16.00  | 56.92                | 10.51               | 46.41  |
| Centre                   | 25.12                | 25.12               | 0      | 20.28                | 8.74                | 11.54  | 38.00                | 8.29                | 29.71  |
| West                     | 24.73                | 7.15                | 17.58  | 22.09                | 9.52                | 12.57  | 36.64                | 6.72                | 29.92  |
| Q1                       | 26.37                | 21.66               | 4.71   | 42.80                | 16.32               | 26.48  | 86.46                | 15.96               | 70.50  |
| Q2                       | 28.51                | 12.94               | 15.57  | 22.77                | 10.17               | 12.60  | 57.13                | 9.57                | 47.56  |
| Q3                       | 18.70                | 9.06                | 9.64   | 17.38                | 8.57                | 8.81   | 28.70                | 6.02                | 22.68  |
| Q4                       | 13.01                | 6.85                | 6.16   | 13.56                | 6.55                | 7.01   | 13.90                | 4.05                | 9.85   |
| <i>MPG<sub>CHE</sub></i> |                      |                     |        |                      |                     |        |                      |                     |        |
| Total                    | 36.52                | 25.43               | 11.09  | 42.32                | 24.14               | 18.18  | 70.61                | 23.35               | 47.26  |
| East                     | 33.46                | 26.88               | 6.58   | 48.54                | 26.97               | 21.57  | 89.67                | 26.58               | 63.09  |
| Centre                   | 29.31                | 29.31               | 0      | 40.94                | 22.73               | 18.21  | 66.53                | 23.33               | 43.20  |
| West                     | 46.82                | 18.95               | 27.87  | 39.00                | 23.09               | 15.91  | 62.91                | 21.16               | 41.75  |
| Q1                       | 37.07                | 30.46               | 6.61   | 54.41                | 26.90               | 27.51  | 100.24               | 27.17               | 73.07  |
| Q2                       | 47.15                | 26.50               | 20.65  | 38.38                | 22.96               | 15.42  | 77.61                | 22.19               | 55.42  |
| Q3                       | 30.72                | 19.84               | 10.88  | 34.12                | 21.86               | 12.26  | 52.38                | 20.65               | 31.73  |
| Q4                       | 29.93                | 21.01               | 8.92   | 36.42                | 23.48               | 12.94  | 42.32                | 22.03               | 20.29  |



**Table 4. The influence of NCMS on the incidence rates of CHE**

|                | Year | Change (%) | Crude           |               | Adjusted        |               |
|----------------|------|------------|-----------------|---------------|-----------------|---------------|
|                |      |            | OR (95 % CI)    | Increment (%) | OR (95 % CI)    | Increment (%) |
| <b>Total</b>   |      |            |                 |               |                 |               |
|                | 2003 | 9.45       | 1.46(1.23-1.74) | -             | 1.50(1.24-1.81) | -             |
|                | 2008 | 13.15      | 1.70(1.61-1.80) | 16.44         | 1.79(1.69-1.90) | 19.33         |
|                | 2013 | 24.10      | 2.68(2.54-2.83) | 57.65         | 2.94(2.77-3.11) | 64.25         |
| <b>Area</b>    |      |            |                 |               |                 |               |
| <b>East</b>    |      |            |                 |               |                 |               |
|                | 2003 | 7.97       | 1.38(1.13-1.69) | -             | 1.43(1.14-1.80) | -             |
|                | 2008 | 12.30      | 1.64(1.48-1.82) | 18.84         | 1.77(1.57-1.99) | 23.78         |
|                | 2013 | 23.91      | 2.66(2.37-2.97) | 62.20         | 3.08(2.71-3.50) | 74.01         |
| <b>Central</b> |      |            |                 |               |                 |               |
|                | 2003 | 0          | 1.00(1.00-1.00) | -             | 1.00(1.00-1.00) | -             |
|                | 2008 | 11.07      | 1.57(1.43-1.72) | 57            | 1.64(1.49-1.82) | 64.00         |
|                | 2013 | 21.62      | 2.42(2.23-2.63) | 54.14         | 2.63(2.40-2.88) | 60.37         |
| <b>West</b>    |      |            |                 |               |                 |               |
|                | 2003 | 15.09      | 1.85(1.24-2.75) | -             | 1.86(1.23-2.82) | -             |
|                | 2008 | 15.41      | 1.86(1.69-2.05) | 0.54          | 1.96(1.77-2.16) | 5.38          |
|                | 2013 | 26.49      | 3.00(2.74-3.28) | 61.29         | 3.22(2.93-3.55) | 64.29         |
| <b>Income</b>  |      |            |                 |               |                 |               |
| <b>Q1</b>      |      |            |                 |               |                 |               |
|                | 2003 | 0          | 1.00(1.00-1.00) | -             | 1.00(1.00-1.00) | -             |
|                | 2008 | 17.98      | 2.39(2.03-2.81) | 139.00        | 2.56(2.16-3.04) | 156.00        |
|                | 2013 | 27.50      | 4.40(3.70-5.24) | 84.10         | 4.65(3.89-5.55) | 81.64         |
| <b>Q2</b>      |      |            |                 |               |                 |               |
|                | 2003 | 11.63      | 1.60(1.08-2.37) | -             | 1.63(1.08-2.45) | -             |
|                | 2008 | 15.02      | 1.83(1.62-2.08) | 14.38         | 1.90(1.67-2.16) | 16.56         |
|                | 2013 | 30.48      | 3.68(3.19-4.25) | 101.09        | 3.86(3.32-4.49) | 103.16        |
| <b>Q3</b>      |      |            |                 |               |                 |               |
|                | 2003 | 15.22      | 1.85(1.21-2.84) | -             | 1.89(1.23-1.92) | -             |
|                | 2008 | 11.71      | 1.61(1.44-1.80) | -12.97        | 1.63(1.46-1.83) | -13.76        |
|                | 2013 | 25.63      | 2.94(2.68-3.23) | 82.61         | 3.04(2.76-3.35) | 86.50         |
| <b>Q4</b>      |      |            |                 |               |                 |               |
|                | 2003 | 10.87      | 1.59(1.08-2.34) | -             | 1.62(1.08-2.41) | -             |
|                | 2008 | 9.35       | 1.53(1.39-1.69) | -3.77         | 1.55(1.41-1.72) | -4.32         |
|                | 2013 | 14.47      | 2.17(1.94-2.43) | 41.83         | 2.21(1.97-2.48) | 42.58         |

1  
2  
3  
4  
5  
6  
7  
8  
9  
10  
11  
12  
13  
14  
15  
16  
17  
18  
19  
20  
21  
22  
23  
24  
25  
26  
27  
28  
29  
30  
31  
32  
33  
34  
35  
36  
37  
38  
39  
40  
41  
42  
43  
44  
45  
46  
47  
48  
49  
50  
51  
52  
53  
54  
55  
56  
57  
58  
59  
60

For peer review only

### Supplementary data 1 The questions in the questionnaire of NHSS employed to calculate indicators

Food consumption expenditure in each household was measured by the question, “How much did your household spend in food consumption expenditure during the last one year?”

The question, “How much did your household spend in living expenditure during the last one year?” was chosen to measure the total living expenditure in each household.

Actual household size was measured by the question, “How many people have a long-term residence at your household?”

The question, “How much did your household spend in medical expenses (without compensations from a third party) during the last one year” was chosen to measure the out-of-pocket health expenditure payment in each household.

### Supplementary data 2

**Table 1 Determinants of catastrophic health expenditure.**

| Determinant                                                    | $\beta$ (95%CI)    | SE   | Z     | P      |
|----------------------------------------------------------------|--------------------|------|-------|--------|
| <b>Gender of householder</b> (male vs female)                  | -0.51(-0.62--0.40) | 0.06 | -8.94 | <.0001 |
| <b>Age of householder</b>                                      | 0.28(0.11-0.46)    | 0.09 | 3.12  | 0.0018 |
| <b>Educational level of householder</b>                        |                    |      |       |        |
| Elementary school vs Illiterate                                | -0.35(-0.48--0.22) | 0.07 | -5.31 | <.0001 |
| Junior high school vs Illiterate                               | -0.49(-0.64--0.35) | 0.07 | -6.84 | <.0001 |
| Senior high school or above vs Illiterate                      | -0.90(-1.11--0.70) | 0.11 | -8.56 | <.0001 |
| <b>One or more members older than 60 years</b><br>(yes vs no)  | 0.39(0.21-0.56)    | 0.09 | 4.35  | <.0001 |
| <b>One or more members younger than 5 years</b><br>(yes vs no) | 0.03(-0.11-0.17)   | 0.07 | 0.37  | 0.7104 |
| <b>Number of household members</b>                             | -0.27(-0.31--0.24) | 0.02 | -14.3 | <.0001 |
| <b>Employment</b> (employed vs others)                         | -0.81(-0.97--0.65) | 0.08 | -7.58 | <.0001 |
| <b>Marital status</b> (married vs others)                      | -0.63(-0.78--0.48) | 0.08 | -7.24 | <.0001 |

**STROBE 2007 (v4) checklist of items to be included in reports of observational studies in epidemiology\***  
**Checklist for cohort, case-control, and cross-sectional studies (combined)**

| Section/Topic             | Item # | Recommendation                                                                                                                                                                                                                                                                                                                                                                                                                                                         | Reported on page # |
|---------------------------|--------|------------------------------------------------------------------------------------------------------------------------------------------------------------------------------------------------------------------------------------------------------------------------------------------------------------------------------------------------------------------------------------------------------------------------------------------------------------------------|--------------------|
| Title and abstract        | 1      | (a) Indicate the study's design with a commonly used term in the title or the abstract                                                                                                                                                                                                                                                                                                                                                                                 | 2                  |
|                           |        | (b) Provide in the abstract an informative and balanced summary of what was done and what was found                                                                                                                                                                                                                                                                                                                                                                    | 2                  |
| <b>Introduction</b>       |        |                                                                                                                                                                                                                                                                                                                                                                                                                                                                        |                    |
| Background/rationale      | 2      | Explain the scientific background and rationale for the investigation being reported                                                                                                                                                                                                                                                                                                                                                                                   | 4                  |
| Objectives                | 3      | State specific objectives, including any pre-specified hypotheses                                                                                                                                                                                                                                                                                                                                                                                                      | 4                  |
| <b>Methods</b>            |        |                                                                                                                                                                                                                                                                                                                                                                                                                                                                        |                    |
| Study design              | 4      | Present key elements of study design early in the paper                                                                                                                                                                                                                                                                                                                                                                                                                | 7                  |
| Setting                   | 5      | Describe the setting, locations, and relevant dates, including periods of recruitment, exposure, follow-up, and data collection                                                                                                                                                                                                                                                                                                                                        | 5                  |
| Participants              | 6      | (a) <i>Cohort study</i> —Give the eligibility criteria, and the sources and methods of selection of participants. Describe methods of follow-up<br><i>Case-control study</i> —Give the eligibility criteria, and the sources and methods of case ascertainment and control selection. Give the rationale for the choice of cases and controls<br><i>Cross-sectional study</i> —Give the eligibility criteria, and the sources and methods of selection of participants | 5                  |
|                           |        | (b) <i>Cohort study</i> —For matched studies, give matching criteria and number of exposed and unexposed<br><i>Case-control study</i> —For matched studies, give matching criteria and the number of controls per case                                                                                                                                                                                                                                                 |                    |
| Variables                 | 7      | Clearly define all outcomes, exposures, predictors, potential confounders, and effect modifiers. Give diagnostic criteria, if applicable                                                                                                                                                                                                                                                                                                                               | 5-7                |
| Data sources/ measurement | 8*     | For each variable of interest, give sources of data and details of methods of assessment (measurement). Describe comparability of assessment methods if there is more than one group                                                                                                                                                                                                                                                                                   | 5,7                |
| Bias                      | 9      | Describe any efforts to address potential sources of bias                                                                                                                                                                                                                                                                                                                                                                                                              |                    |
| Study size                | 10     | Explain how the study size was arrived at                                                                                                                                                                                                                                                                                                                                                                                                                              |                    |
| Quantitative variables    | 11     | Explain how quantitative variables were handled in the analyses. If applicable, describe which groupings were chosen and why                                                                                                                                                                                                                                                                                                                                           | 7                  |
| Statistical methods       | 12     | (a) Describe all statistical methods, including those used to control for confounding                                                                                                                                                                                                                                                                                                                                                                                  | 7                  |
|                           |        | (b) Describe any methods used to examine subgroups and interactions                                                                                                                                                                                                                                                                                                                                                                                                    | 7                  |
|                           |        | (c) Explain how missing data were addressed                                                                                                                                                                                                                                                                                                                                                                                                                            |                    |
|                           |        | (d) <i>Cohort study</i> —If applicable, explain how loss to follow-up was addressed<br><i>Case-control study</i> —If applicable, explain how matching of cases and controls was addressed                                                                                                                                                                                                                                                                              |                    |

|                          |     |                                                                                                                                                                                                              |       |
|--------------------------|-----|--------------------------------------------------------------------------------------------------------------------------------------------------------------------------------------------------------------|-------|
|                          |     | <i>Cross-sectional study</i> —If applicable, describe analytical methods taking account of sampling strategy                                                                                                 | 5     |
|                          |     | (e) Describe any sensitivity analyses                                                                                                                                                                        |       |
| <b>Results</b>           |     |                                                                                                                                                                                                              |       |
| Participants             | 13* | (a) Report numbers of individuals at each stage of study—eg numbers potentially eligible, examined for eligibility, confirmed eligible, included in the study, completing follow-up, and analysed            | 5     |
|                          |     | (b) Give reasons for non-participation at each stage                                                                                                                                                         | 5     |
|                          |     | (c) Consider use of a flow diagram                                                                                                                                                                           |       |
| Descriptive data         | 14* | (a) Give characteristics of study participants (eg demographic, clinical, social) and information on exposures and potential confounders                                                                     | 8     |
|                          |     | (b) Indicate number of participants with missing data for each variable of interest                                                                                                                          |       |
|                          |     | (c) <i>Cohort study</i> —Summarise follow-up time (eg, average and total amount)                                                                                                                             |       |
| Outcome data             | 15* | <i>Cohort study</i> —Report numbers of outcome events or summary measures over time                                                                                                                          |       |
|                          |     | <i>Case-control study</i> —Report numbers in each exposure category, or summary measures of exposure                                                                                                         |       |
|                          |     | <i>Cross-sectional study</i> —Report numbers of outcome events or summary measures                                                                                                                           | 8     |
| Main results             | 16  | (a) Give unadjusted estimates and, if applicable, confounder-adjusted estimates and their precision (eg, 95% confidence interval). Make clear which confounders were adjusted for and why they were included | 9     |
|                          |     | (b) Report category boundaries when continuous variables were categorized                                                                                                                                    | 19    |
|                          |     | (c) If relevant, consider translating estimates of relative risk into absolute risk for a meaningful time period                                                                                             |       |
| Other analyses           | 17  | Report other analyses done—eg analyses of subgroups and interactions, and sensitivity analyses                                                                                                               | 8-9   |
| <b>Discussion</b>        |     |                                                                                                                                                                                                              |       |
| Key results              | 18  | Summarise key results with reference to study objectives                                                                                                                                                     | 10-12 |
| Limitations              | 19  | Discuss limitations of the study, taking into account sources of potential bias or imprecision. Discuss both direction and magnitude of any potential bias                                                   | 3     |
| Interpretation           | 20  | Give a cautious overall interpretation of results considering objectives, limitations, multiplicity of analyses, results from similar studies, and other relevant evidence                                   | 10-12 |
| Generalisability         | 21  | Discuss the generalisability (external validity) of the study results                                                                                                                                        |       |
| <b>Other information</b> |     |                                                                                                                                                                                                              |       |
| Funding                  | 22  | Give the source of funding and the role of the funders for the present study and, if applicable, for the original study on which the present article is based                                                | 13    |

\*Give information separately for cases and controls in case-control studies and, if applicable, for exposed and unexposed groups in cohort and cross-sectional studies.

**Note:** An Explanation and Elaboration article discusses each checklist item and gives methodological background and published examples of transparent reporting. The STROBE checklist is best used in conjunction with this article (freely available on the Web sites of PLoS Medicine at <http://www.plosmedicine.org/>, Annals of Internal Medicine at <http://www.annals.org/>, and Epidemiology at <http://www.epidem.com/>). Information on the STROBE Initiative is available at [www.strobe-statement.org](http://www.strobe-statement.org).

# BMJ Open

## Impact of New Cooperative Medical Scheme on the Trend of Catastrophic Health Expenditure in Chinese Rural Households: results from nationally representative surveys from 2003 to 2013

|                                 |                                                                                                                                                  |
|---------------------------------|--------------------------------------------------------------------------------------------------------------------------------------------------|
| Journal:                        | <i>BMJ Open</i>                                                                                                                                  |
| Manuscript ID                   | bmjopen-2017-019442.R2                                                                                                                           |
| Article Type:                   | Research                                                                                                                                         |
| Date Submitted by the Author:   | 19-Dec-2017                                                                                                                                      |
| Complete List of Authors:       | Xie, Biao<br>Huo, Minghe<br>Wang, Zhiqiang; University of Queensland, School of Medicine<br>Chen, Yongjie<br>Fu, Rong<br>Liu, Meina<br>Meng, Qun |
| <b>Primary Subject Heading</b>: | Health services research                                                                                                                         |
| Secondary Subject Heading:      | Health services research, Health policy, Health economics                                                                                        |
| Keywords:                       | CHE, rural households with hospitalized members, NCMS, NHSS                                                                                      |
|                                 |                                                                                                                                                  |

SCHOLARONE™  
Manuscripts

Only

1  
2  
3  
4  
5  
6  
7  
8  
9  
10  
11  
12  
13  
14  
15  
16  
17  
18  
19  
20  
21  
22  
23  
24  
25  
26  
27  
28  
29  
30  
31  
32  
33  
34  
35  
36  
37  
38  
39  
40  
41  
42  
43  
44  
45  
46  
47  
48  
49  
50  
51  
52  
53  
54  
55  
56  
57  
58  
59  
60

1           **Impact of New Cooperative Medical Scheme on the Trend of**  
2           **Catastrophic Health Expenditure in Chinese Rural Households:**  
3           **results from nationally representative surveys from 2003 to 2013**

5           Biao Xie<sup>1</sup> PHD, Minghe Huo<sup>2</sup> PHD, Zhiqiang Wang<sup>3</sup> PHD, Yongjie Chen<sup>1</sup> PHD, Rong Fu<sup>4</sup> PHD,

6           Meina Liu<sup>1\*</sup> PHD, Qun Meng<sup>2\*</sup> PHD

7           <sup>1</sup>Department of Biostatistics, Public Health College, Harbin Medical University, Harbin City,

8           Heilongjiang Province, China.

9           <sup>2</sup>Department of Health management, Public Health College, Harbin Medical University, Harbin

10          City, Heilongjiang Province, China.

11          <sup>3</sup>School of Medicine, the University of Queensland, Room 817, Health Sciences Building, Royal

12          Brisbane & Women's Hospital, Herston QLD, Australia.

13          <sup>4</sup>Department of Epidemiology and Biostatistics, Public Health College, Fujian Medical University,

14          Fuzhou City, Fujian Province, China.

15          \*Correspondence author: [liumeina369@163.com](mailto:liumeina369@163.com) and [mengqun@nhfpc.gov.cn](mailto:mengqun@nhfpc.gov.cn) Fax:

16          +86+(0451)87502680, Telephone Number: +86+(0451)87502680

1  
2  
3  
4  
5  
6  
7  
8  
9  
10  
11  
12  
13  
14  
15  
16  
17  
18  
19  
20  
21  
22  
23  
24  
25  
26  
27  
28  
29  
30  
31  
32  
33  
34  
35  
36  
37  
38  
39  
40  
41  
42  
43  
44  
45  
46  
47  
48  
49  
50  
51  
52  
53  
54  
55  
56  
57  
58  
59

## 29 Abstract

30 **Objective** To evaluate the trend of catastrophic health expenses (CHE) for inpatient  
31 care in relation to the commencement of New Cooperative Medical Scheme (NCMS)  
32 in rural China from 2003 to 2013 and the roles of NCMS in protecting affected  
33 households from CHE.

34 **Methods** We assessed 10-year trend of the incidence and severity of CHE in rural  
35 households with hospitalized members using the data from Chinese National Health  
36 Services Survey (NHSS). Generalized Estimating Equations (GEE) were used to  
37 estimate the odds ratio (OR) and 95% confidence interval (CI) for the association  
38 between incidence rates of CHE ( $R_{CHE}$ ) and NCMS reimbursement.

39 **Results** The incidence and severity of CHE after NCMS reimbursement both  
40 decreased and their changes increased rapidly from 2003 to 2013. After adjustment of  
41 the covariates, the  $R_{CHE}$  before reimbursement was significantly higher than that after  
42 reimbursement and the OR (95% CI) was 1.50(1.24-1.81), 1.79(1.69-1.90) and  
43 2.94(2.77-3.11) in the year of 2003, 2008 and 2013, respectively.

44 **Conclusion** The incidence and severity of CHE both reduced after NCMS  
45 reimbursements in each year. Excluding some confounding factors,  $R_{CHE}$  was  
46 significantly associated with NCMS reimbursement. The NCMS partly protected the  
47 rural households with hospitalized members from CHE. However, the inequalities  
48 between different income groups still existed. The  $R_{CHE}$  in rural households with  
49 hospitalized members were still rather high in 2003, 2008 and 2013 even though they  
50 were covered with NCMS. This study will provide suggestions for further reforms in  
51 China and guidance for other developing countries.

52  
53 **Keywords** CHE; rural households with hospitalized members; NCMS; NHSS.  
54  
55  
56  
57  
58  
59



1  
2  
3  
4  
5  
6  
7  
8  
9  
10  
11  
12  
13  
14  
15  
16  
17  
18  
19  
20  
21  
22  
23  
24  
25  
26  
27  
28  
29  
30  
31  
32  
33  
34  
35  
36  
37  
38  
39  
40  
41  
42  
43  
44  
45  
46  
47  
48  
49  
50  
51  
52  
53  
54  
55  
56  
57  
58  
59  
60

60 **Strengths and limitations of this study**

- 61 ▶ Generalized Estimating Equations (GEE) were used to estimate OR and 95% CI
- 62 for the association between the catastrophe's incidence and NCMS
- 63 reimbursement.
- 64 ▶ We assessed 10-year trend of the incidence and severity of CHE at national level
- 65 using the data from the Chinese National Health Services Survey (NHSS).
- 66 ▶ Three indicators were used to capture the catastrophe's incidence and intensity.
- 67 ▶ The sample size in 2003 was small with only 180 households.

1  
2  
3 894 90 **Introduction**

5  
6 91 The New Cooperative Medical System (NCMS) was introduced to rural China in  
7  
8 92 2003. It was designed to provide financial protection for its enrollees. In terms of the  
9  
10 93 enrollment size, NCMS is by far the largest health insurance plan in the world.<sup>1</sup>  
11  
12 94 Catastrophic health expenses (CHE) is defined as an out-of-pocket health expenditure  
13  
14 95 which is larger than 40% of the household's capacity to pay (CTP).<sup>2</sup> CHE is an  
15  
16 96 indicator reflecting the effectiveness of financial protection a health insurance could  
17  
18 97 provide for its members. In 2008, 15.1% of the rural households and 35.0% of the  
19  
20 98 rural households with hospitalized members faced CHE in China.<sup>3 4</sup> It was essential to  
21  
22 99 evaluate the role of NCMS in preventing CHE among its members. There had been  
23  
24 100 many studies measuring the impact of NCMS. However, most studies focused on a  
25  
26 101 specific local area or the short-term effect of NCMS on CHE in China.<sup>3-10</sup> NCMS  
27  
28 102 focused on inpatient care reimbursement. Among studies on the impact of NCMS on  
29  
30 103 CHE, those focusing on affected rural households with hospitalized members were  
31  
32 104 valuable. However, few previous studies had focused on such affected rural  
33  
34 105 households.

35  
36 106 We assessed 10-year trend of the incidence and severity of CHE in rural  
37  
38 107 households with hospitalized members at national level using the data from the  
39  
40 108 Chinese National Health Services Survey (NHSS). The trend of CHE for inpatient  
41  
42 109 care in relation to the commencement of NCMS in rural China from 2003 to 2013 and  
43  
44 110 the roles of NCMS in protecting affected households from CHE can provide evidence  
45  
46 111 for NCMS in improving the financial protection for Chinese residents. As an  
47  
48 112 exploratory attempt to study the impact of NCMS on CHE of rural households with  
49  
50 113 hospitalized members, this study can provide some recommendations for the next  
51  
52 114 phase of health reform for policy-makers.

53 115  
54 116  
55 117  
56 118  
57 119

1  
2  
3 120

4 121

5  
6 122 **Method**7  
8 123 **Data source and study population**

9 124 Data used in this study was derived from the Chinese third NHSS in 2003, the fourth

10 125 NHSS in 2008 and the fifth NHSS in 2013. As the largest statewide health survey in

11 126 China, the NHSS was organized by the Chinese government every 5 years since 1993.

12 127 All data in NHSS was collected using a structured questionnaire, whose validity and

13 128 reliability had been demonstrated.<sup>11 12</sup> The NHSS was done with a robust multi-stage14 129 and stratified random cluster sampling method.<sup>13</sup> A total of 94 counties were selected

15 130 from 2859 counties in 31 provinces, autonomous regions, and municipalities in China.

16 131 In each county, five townships were selected within which two villages were selected.

17 132 A total of 470 townships and 940 villages were included. In each village, 60

18 133 households were selected.<sup>14</sup> The institutional review board of the Chinese National

19 134 Bureau of Statistics provided review and ethics approval of the survey. A district

20 135 survey manager checked the questionnaires at the end of each day to avoid missing

21 136 information or logic errors. 5% of the sampled households were randomly selected to

22 137 be revisited to examine survey quality (95% was achieved).<sup>13</sup> According to a test

23 138 conducted by the Health Statistical Center of the Ministry of Health of China, the

24 139 survey data was representative of structure of overall national population compared

25 140 with the 2007 National Sampling Survey of Population Change.<sup>13</sup>

26 141 This study focused on the incidence and severity of CHE of rural households

27 142 with hospitalized members covered by NCMS. Households which didn't join NCMS

28 143 or didn't use inpatient services were not covered. This yielded a final sample of 6975

29 144 households which experienced inpatient care during the study period (180 in 2003,

30 145 2326 in 2008 and 4469 in 2013).

31 146 **The introduction of indicators**

32 147 Out-of-pocket health expenditure payment (OOP) refers to the expenditure made by

33 148 each household member after they receive health services without compensations

34 149 from a third party. The poverty line is the average food expenditure of households of

150 which food share is in the 45th to 55th percentile range. The detailed definition of  
 151 poverty line used in the study was showed in Supplementary information. This  
 152 poverty line multiplied by the equalized household size (actual household size<sup>0.56</sup>) is  
 153 household subsistence spending. CTP is generally defined as a non-subsistence  
 154 spending. However, when food expenditure is lower than subsistence spending in  
 155 some households, the non-food expenditure is used as non-subsistence spending in  
 156 this particular situation.<sup>1 4</sup> The information on the questions in the questionnaire of  
 157 NHSS employed to calculate indicators below were showed in Supplementary  
 158 information.

### 159 (1) The incidence rates of CHE

160 There were various definitions of CHE, we employed the method recommended by  
 161 World Health Organization (WHO) for calculating CHE in this study. An OOP is  
 162 considered financially catastrophic when it is larger than 40% of the household's  
 163 CTP.<sup>1</sup> Let  $R_{CHE}$  denotes the incidence rates of CHE, which can be calculated as

$$164 \quad R_{CHE} = \frac{1}{N} \sum_{i=1}^N E_i \quad (1)$$

165 Where  $N$  represents the sample size.  $E_i = 1$  when  $^{OOP}/_{CTP} \geq 0.4$ ;  $E_i = 0$  when  
 166  $^{OOP}/_{CTP} < 0.4$ .

### 167 (2) The definitions and calculations of mean CHE gap ( $G_{CHE}$ ) and mean positive CHE 168 gap ( $MPG_{CHE}$ )

169 The  $G_{CHE}$  describes how much of a household's health expenditure is in excess of the  
 170 threshold of 40% of its CTP, which is estimated to reveal the average level of CHE  
 171 severity for all studied households. The  $MPG_{CHE}$  refers to the average of the sum of the  
 172 total excesses from all the catastrophic households in the sample.<sup>1</sup>  $G_{CHE}$  and  $MPG_{CHE}$   
 173 can be calculated as

$$174 \quad G_{CHE} = \frac{1}{N} \sum_{i=1}^N O_i \quad (2)$$

$$175 \quad MPG_{CHE} = \frac{\sum_{i=1}^N O_i}{\sum_{i=1}^N E_i} \quad (3)$$

1  
2  
3 176 Where  $O_i = \text{OOP}/\text{CTP} - 0.4$  when  $\text{OOP}/\text{CTP} > 0.4$ ;  $O_i = 0$  when  $\text{OOP}/\text{CTP} \leq 0.4$ .

### 177 **The introduction of Generalized Estimating Equations (GEE)**

178 GEE is based on the quasi-likelihood function and generalized linear model. It can be  
179 used to resolve repeated measures issues.<sup>15-17</sup> GEE has the following advantages:

180 (1) More robust modeling. When connectivity function of GEE is correct, we can  
181 get stable parameter estimates even if the correlation matrix is chosen  
182 randomly;

183 (2) Flexibility. Dependent variable of GEE can follow any kind of exponential  
184 distribution. Various covariance structures can also be chosen.<sup>15-17</sup>

185 In this study, the  $R_{\text{CHE}}$  of each household had two records, one before NCMS  
186 reimbursement and one after. We took it as a repeated measures analysis. Dependent  
187 and independent variable is the prevalence status of CHE and reimbursement status  
188 of NCMS, respectively. We performed GEE with logit link to estimate OR and 95%  
189 CI for the association between the  $R_{\text{CHE}}$  and NCMS reimbursement.

### 190 **Statistical analysis**

191 Categorical variables and expenditure measures were described by numbers  
192 (percentages) and means (standard deviation), respectively. Annual household income  
193 in 2008 and 2013 was transformed by Consumer Price Index (CPI) to the price level  
194 in 2003 with the transformation formula: real price = nominal price  $\times$  (CPI of base  
195 year/CPI of object year).<sup>18</sup> Annual household income was classified as quartiles.  
196 Three indicators above captured the catastrophe's incidence and intensity. We used  
197 stratification analysis to assess the 10-year trend of these indicators before and after  
198 NCMS reimbursement. The impact of NCMS in each year was reflected in the  
199 difference in CHE before and after reimbursement. The trend of difference from 2003  
200 to 2013 reflected overall change of the impact of NCMS. Data was disaggregated by  
201 three geographic regions (east, central and west) and four household income levels.  
202 The  $R_{\text{CHE}}$  of each household had two records in each year, one before NCMS  
203 reimbursement and one after. We took it as a repeated measures analysis. GEE was

204 used to estimate OR and 95% CI for the association between the  $R_{\text{CHE}}$  and NCMS  
205 reimbursement. Covariates including age, gender, education level, employment and  
206 marital status of household head, household size, one or more members younger than  
207 5 years and one or more members older than 60 years were adjusted. All of the  
208 analyses were performed using SAS 9.2 (SAS Institute Inc., Cary, NC, USA). A  
209 two-sided  $P < 0.05$  was established as the level of statistical significance for all tests.

210

## 211 **Result**

### 212 **Characteristics of Households**

213 Characteristics of all households enrolled in the study in 2003, 2008 and 2013 were  
214 shown in Table 1. The age of householders increased from 2003 to 2013, 49.38% of  
215 the householders were of age 60 or older in 2013. The proportion of households with  
216 one or more members younger than 5 years decreased from 17.78% in 2003 to 14.84%  
217 in 2013. The proportion of households with people of age 60 or older showed a 12.96%  
218 increase from 2003 to 2013. The proportion of householders with a junior high school  
219 or higher degree increased from 31.67% in 2003 to 40.17% in 2013. Annual  
220 household income of each year was divided into quartiles, with each quartile cutoffs  
221 shifting upward from 2003 to 2013.

### 222 **The incidence rates of CHE**

223 Table 2 showed the  $R_{\text{CHE}}$  among all the studied households. After NCMS  
224 reimbursement, the total  $R_{\text{CHE}}$  decreased rapidly, from 49.44% in 2003 to 34.88% in  
225 2013. The change of the total  $R_{\text{CHE}}$  before and after reimbursement increased rapidly,  
226 from 9.45% in 2003 to 24.10% in 2013. A similar pattern was observed in different  
227 regions and different income levels. In addition, the poorest had the highest incidence  
228 and the change in the west region was bigger than those in other regions.

### 229 **The Severity of CHE**

230 The severity of CHE among all the studied households was shown in Table 3. After  
231 NCMS reimbursement, the total  $G_{\text{CHE}}$  exhibited a decreased trend, from 12.57% in  
232 2003 to 8.15% in 2013. The change of the total  $G_{\text{CHE}}$  before and after reimbursement

1  
2  
3  
4 233 increased rapidly from 8.94% in 2003 to 33.50% in 2013. Different regions and  
5  
6 234 different income levels had similar patterns. In addition, the highest  $G_{CHE}$  was observed  
7  
8 235 in the poorest areas. A similar trend could be observed in  $MPG_{CHE}$ . The change of  
9  
10 236  $MPG_{CHE}$  was higher than that of  $G_{CHE}$  in each year.

### 11 237 **The influence of NCMS on the incidence rates of CHE**

12  
13 238 Table 4 showed the influence of NCMS on  $R_{CHE}$ . In the aggregate, the  $R_{CHE}$  before  
14  
15 239 NCMS reimbursement was significantly higher than that after NCMS reimbursement  
16  
17 240 and the OR (95% CI) was 1.46(1.23-1.74), 1.70(1.61-1.80) and 2.68(2.54-2.83) in  
18  
19 241 2003, 2008 and 2013, respectively. The OR changed rapidly. There was a 16.44%  
20  
21 242 increase in the year 2008 compared to 2003 and a 57.65% increase in the year 2013  
22  
23 243 compared to 2008. After adjustment of the covariates, the OR (95% CI) was  
24  
25 244 1.50(1.24-1.81), 1.79(1.69-1.90) and 2.94(2.77-3.11) in 2003, 2008 and 2013,  
26  
27 245 respectively. There was a 19.33% increase in the year 2008 compared to 2003 and a  
28  
29 246 64.25% increase in the year 2013 compared to 2008. A similar pattern was observed  
30  
31 247 in different regions and at different income levels but there were several exceptions in  
32  
33 248 central region and the lowest income groups of 2003 where the  $R_{CHE}$  before NCMS  
34  
35 249 reimbursement was not significantly higher than that after NCMS reimbursements.  
36  
37 250 Among these covariates, the protection factors of the CHE were the male gender of  
38  
39 251 the householder, higher level of education of the householder and bigger household  
40  
41 252 size. The risk factors of the CHE were having one or more members older than 60 and  
42  
43 253 the older age of the householder (Supplementary information).

44 254

### 45 255 **Discussion**

46  
47 256 According to Chinese NHSS in 1998 and 2003, rural residents' health expenditures  
48  
49 257 grew at an annual rate of 11.48%, which was four times faster than their net income.<sup>18</sup>  
50  
51 258 High healthcare expenses in the absence of financial protection forced these rural  
52  
53 259 households to fall into a difficult circumstance: "It's too difficult to see a doctor, and  
54  
55 260 too expensive to seek health care!"<sup>18</sup> In 2003, 96% of rural households in China

1  
2  
3  
4 261 lacked medical insurance, and 38% of the sick didn't seek medical attention.<sup>13 18</sup> To  
5  
6 262 address this issue, NCMS was introduced to Chinese rural areas in 2003. With great  
7  
8 263 efforts of the government, NCMS had experienced rapid growth in coverage. By 2011,  
9  
10 264 97.5% of the rural population had been covered by NCMS in China.<sup>3 18 19</sup> This had  
11  
12 265 fueled a significantly increased consumption of health services due to previously  
13  
14 266 latent unmet demand. From 2003 to 2008, the inpatient hospital admission rate for  
15  
16 267 rural residents almost doubled.<sup>1 4 18</sup> The  $R_{\text{CHE}}$  of rural households with hospitalized  
17  
18 268 members was much higher than other rural households.<sup>4</sup> It was meaningful to evaluate  
19  
20 269 the effectiveness of NCMS to provide financial protection specifically for these rural  
21  
22 270 households with hospitalized members.

23  
24 271 In our study,  $R_{\text{CHE}}$  of these households before NCMS reimbursement were 58.89%,  
25  
26 272 54.90% and 58.98% for 2003, 2008 and 2013, respectively (Table 2). Approximately  
27  
28 273 60% of the households would fall into CHE and be susceptible to disease-induced  
29  
30 274 poverty if they were not covered with NCMS in three years. After NCMS  
31  
32 275 reimbursement, the  $R_{\text{CHE}}$  decreased with different degrees, which were lowered to  
33  
34 276 49.44%, 41.75% and 34.88% for 2003, 2008 and 2013, respectively (Table 2). The  
35  
36 277 total  $G_{\text{CHE}}$  and  $MPG_{\text{CHE}}$  also decreased after NCMS reimbursement (Table 3). The  
37  
38 278 incidence and severity of CHE before NCMS reimbursement were higher than that  
39  
40 279 after NCMS reimbursement in three years, which confirmed the effectiveness of  
41  
42 280 NCMS to reduce CHE. Moreover, after adjustment of the covariates,  $R_{\text{CHE}}$  was  
43  
44 281 significantly associated with NCMS reimbursement ( $P < 0.05$ ) (Table 4). To some  
45  
46 282 extent, the NCMS protected the rural households with hospitalized members from  
47  
48 283 CHE. Inpatient reimbursement rates in rural areas had a remarkable achievement,  
49  
50 284 increasing 7.5 times from 5.8% in 2003 to 43.7% in 2011.<sup>3</sup> The financial protection in  
51  
52 285 rural areas have been steadily improved. An apparent enhancement could be seen in  
53  
54 286 this protective effect from 2003 to 2013, especially after the 2009 Health Care Reform.  
55  
56 287 Having one or more members older than 60 in a household, female gender and older



1  
2  
3 288 age of the householder, lower level of education of the householder and smaller  
4  
5 289 household size increased the risk of incurring CHE in our study (Supplementary  
6  
7 290 information). This was consistent with the previous studies.<sup>4,20-23</sup> The NCMS should  
8  
9 291 make preferential policies for these high-risk populations, such as providing special  
10  
11 292 subsidies and an extra benefit package to them. As with targeted poverty alleviation,  
12  
13 293 targeted policies should be designed to achieve targeted CHE alleviation among these  
14  
15 294 households.

16  
17 295 It was worth noting that the  $R_{CHE}$  in rural households with hospitalized members  
18  
19 296 in three years were all more than 34% after NCMS reimbursement, which meant that  
20  
21 297 a number of households still faced CHE even though they were covered with NCMS  
22  
23 298 (Table 2). Many studies had shown that CHE was very likely to occur in households  
24  
25 299 with poor economic conditions.<sup>24-27</sup> The rural households with hospitalized members  
26  
27 300 have heavy economic burdens and are likely to fall into such conditions. Thus, our  
28  
29 301 study population tend to have higher proportion of CHE than previously reported in  
30  
31 302 the whole rural households. Another reason for high proportion of CHE in these  
32  
33 303 households is the limited numbers of drugs and treatments included in the scope of  
34  
35 304 NCMS. Under the fee-for-service payment system in China, doctors had strong  
36  
37 305 incentives to prescribe expensive drugs and examinations not included by NCMS.<sup>4</sup>  
38  
39 306 The NCMS needs to increase financial investment to expand its catalogue of essential  
40  
41 307 medicines, especially for medicines which could increase the profits of medical  
42  
43 308 institutions and pharmaceutical factories. An effective monitoring system is needed to  
44  
45 309 restrain oversupply of expensive medical services and ensures that first-line generic  
46  
47 310 medicines are available and preferentially prescribed.

48  
49 311 We observed that all three indicators declined with the increase of household  
50  
51 312 income in our study (Table 2 and Table 3). Low-income households were more likely  
52  
53 313 to incur CHE than other groups. One of the main reasons is their limited ability to pay  
54  
55 314 for non-subsistence spending. These households are likely to fall into CHE, even as a  
56  
57 315 result of low health expenditure. This phenomenon had also been experienced in

1  
2  
3  
4 316 many developing countries in Asia.<sup>20 27-29</sup> The inequalities of three indicators between  
5  
6 317 different income groups still existed from 2003 to 2013 (Table 2 and Table 3). Equity  
7  
8 318 needs to be considered in the upgrade of NCMS. A higher share of resources should  
9  
10 319 be allocated to areas with poor economic capacity, especially for low-income  
11  
12 320 households, known as ‘Dibaohu’ in China. The current medical financial assistance  
13  
14 321 scheme (MFA), which was a scheme designed to provide support to the poor  
15  
16 322 households for their CHE, should be further promoted to play a more efficient role in  
17  
18 323 preventing CHE.

19 324 The changes of  $R_{CHE}$  and OR before and after NCMS reimbursement in the west  
20  
21 325 region were larger than the corresponding values in other regions in three years (Table  
22  
23 326 2 and Table 4). A higher share of resources was allocated to west region. Inpatient  
24  
25 327 reimbursement rates of east, central and west geographic regions in 2011 was 46.8%,  
26  
27 328 41.2% and 51.2%, respectively.<sup>3 29</sup> Almost all three indicators after NCMS  
28  
29 329 reimbursement decreased rapidly from 2003 to 2008 but slowed down from 2008 to  
30  
31 330 2013 (Table 2 and Table 3). This is due to the worst health situation in 2003 and the  
32  
33 331 saturated health situation in 2008.<sup>30 31</sup>

34 332 With the establishment of basic medical and health system and the improvement  
35  
36 333 of residents’ health consciousness, the demand for medical and health services has  
37  
38 334 increased rapidly. Two-week prevalence rate of residents increased from 18.9% in  
39  
40 335 2008 to 24.1% in 2013, prevalence rate of chronic diseases increased from 24.1% in  
41  
42 336 2008 to 33.1% in 2013 and the rate of resident hospitalization increased by 150% in  
43  
44 337 the last 10 years.<sup>32</sup> Accordingly, medical expenditures have also increased rapidly.<sup>32 33</sup>  
45  
46 338 The financial protection of the NCMS in rural areas faces great challenges. To further  
47  
48 339 prevent CHE, NCMS should increase financing level to lower the deductibles and  
49  
50 340 co-payments, and set higher reimbursement rates and ceilings. A more effective cost  
51  
52 341 control mechanism is also important.

53 342 There are several strengths in this study. First, to control the validity and  
54  
55 343 reliability of statistical analysis, GEE, in view of its advantages, was used to estimate

1  
2  
3  
4 344 OR and 95% CI for the association between the catastrophe's incidence and NCMS  
5 345 reimbursement. Second, most studies focused on a specific local area or the  
6 346 short-term effect of NCMS on CHE in China. We assessed 10-year trend of the  
7 347 incidence and severity of CHE at national level using the data from NHSS. Third,  
8 348 three indicators were used to capture the catastrophe's incidence and intensity and  
9 349 data was disaggregated by three geographic regions and four household income levels.  
10  
11 350 There are also some limitations in this study. First, the NCMS was at the start stage in  
12 351 2003 and the coverage was very low in rural China. Therefore, the sample size in  
13 352 2003 was small with only 338 households. However, the impact of NCMS in 2003,  
14 353 2008 and 2013 was reflected in the difference in CHE before and after reimbursement  
15 354 and all the analysis was independently conducted in each year. In addition, we  
16 355 focused the overall trend of results from 2003 to 2013 and the sample size in 2003 had  
17 356 little influence on this trend. Second, we only focused on the rural households with  
18 357 hospitalized members covered by the NCMS in this study. This limited the  
19 358 generalizability of the results considering that our results were specific to these  
20 359 households. Our findings should be interpreted cautiously. The inclusion of data from  
21 360 other countries should contribute to the ability to generalize the results of future  
22 361 studies.

### 362 363 **Conclusion**

364 The  $R_{CHE}$ ,  $G_{CHE}$  and  $MPG_{CHE}$  all decreased rapidly after NCMS reimbursement and their  
365 changes increased rapidly from 2003 to 2013. After adjustment of the covariates, the  
366  $R_{CHE}$  after NCMS reimbursement were significantly lower than that before NCMS  
367 reimbursements in each year. The NCMS partly protected the rural households with  
368 hospitalized members from CHE. The financial protection in rural areas had been  
369 steadily improved with the development of NCMS. However, the inequalities between  
370 different groups still existed. The  $R_{CHE}$  in rural households with hospitalized members

1  
2  
3 371 in three years were all more than 34% after reimbursement, which meant that many  
4  
5 372 households still faced CHE even though they were covered with NCMS. To further  
6  
7 373 prevent CHE, NCMS should increase financing level to provide a better benefit  
8  
9 374 package and increase reimbursement rates, make preferential policies for the high-risk  
10  
11 375 populations and low-income households, properly expand catalogue of essential  
12  
13 376 medicines and establish effective supervision system. A high-quality health care in  
14  
15 377 China will contribute to global health because of China's great population share in the  
16  
17 378 world. Undoubtedly, the gain and loss during this reform will serve as reference for  
18  
19 379 other countries, especially developing countries.

20  
21 380

### 22 381 **Acknowledgment**

23  
24 382 The authors would like to thank all the participants in this study.

25  
26 383

### 27 384 **Contributors**

28  
29 385 XB, W-ZQ and H-MH drafted the manuscript. C-YJ and FR performed data collection  
30  
31 386 and statistical analyses. L-MN and MQ made a substantial contribution to the  
32  
33 387 interpretation of the data and study design. All authors read and approved the final  
34  
35 388 manuscript.

36  
37 389

38  
39 390 **Funding:** The research is funded by National Natural Science Foundation of China  
40  
41 391 [81273183 to Liu MN].

42  
43 392

44 393 **Competing interests:** None declared.

45  
46 394

47  
48 395 **Ethics approval:** The institutional review board of the Chinese National Bureau of  
49  
50 396 Statistics provided review and ethics approval of the survey.

51  
52 397

53  
54 398 **Data sharing statement:** Original data is available on request. It was stored on

1  
2  
3  
4 399 password-protected computers at the center for health statistics information of  
5 400 Ministry of Health in Beijing, China.

6  
7 401

8  
9 402

10  
11 403

12  
13 404

14  
15 405 **References**

16 406 1. New Cooperative Medical Scheme in 2011. Ministry of Health of the People's  
17 407 Republic of China; 2012.

18  
19  
20 408 2. Xu K. Distribution of health payments and catastrophic expenditures  
21 409 methodology. Geneva: Department of Health System Financing, WHO; 2005.

22  
23 410 3. Meng Q, Xu L, Zhang Y, et al. Trends in access to health services and  
24 411 financial protection in China between 2003 and 2011: a cross-sectional study.  
25 412 *Lancet* 2012;379:805–814.

26  
27  
28  
29 413 4. Li Y, Wu Q, Liu C, et al. Catastrophic health expenditure and rural household  
30 414 impoverishment in China: what role does the new cooperative health insurance  
31 415 scheme play. *PLoS One* 2014;9:e93253.

32  
33  
34 416 5. Sun YL, Xu LZ. The equity research of health service among urban and rural  
35 417 different professions residents in WeiHai. *Chinese Health Service*  
36 418 *Management* 2007;23:584–586.

37  
38  
39  
40 419 6. Wu B. Dental service utilization among urban and rural older adults in China –  
41 420 a brief communication. *J Public Health Dent* 2007;67:185–188.

42  
43  
44 421 7. Liang QJ, Zhang XY, Shen X. The equity of health service utilization among  
45 422 urban and rural residents in China. *Health Economics Research* 2010;5:26–28.

46  
47 423 8. Zhang ZG, Huang L. Research on the disparity and equalization between city  
48 424 and countryside of basic medical safeguard in China. *Reformation & Strategy*  
49 425 2011;27:176–179.

50  
51  
52  
53 426 9. Hong LJ. Analysis of regional balance in maternal and children health services  
54 427 utilization and its change in China. AnHui, HeFei: AnHui Medical University;

- 1  
2  
3 428 2011.  
4  
5 429 10. Wang Q, Liu H, Lu ZX, et al. Role of the new rural cooperative medical  
6  
7 430 system in alleviating catastrophic medical payments for hypertension, stroke  
8  
9 431 and coronary heart disease in poor rural areas of China. *BMC Public Health*  
10  
11 432 2014;14:907.  
12  
13 433 11. Liu Y, Rao K, Wu J, et al. China's health system performance. *Lancet*  
14  
15 434 2008;372(9653):1914-23.  
16  
17 435 12. Center for Health Statistics and Information. Reports of Nation Health Service  
18  
19 436 Survey Summary. 2004.  
20  
21 437 13. Analysis report of national health services survey in China, 2008. Beijing:  
22  
23 438 Center for Health Statistics and Information, Ministry of Health China; 2009.  
24  
25 439 14. Xu L, Wang Y, Collins CD, et al. Urban health insurance reform and coverage  
26  
27 440 in China using data from National Health Services surveys in 1998 and 2003.  
28  
29 441 *BMC Health Serv Res* 2007;7:37.  
30  
31 442 15. Zeger SL, Liang KY. Longitudinal data analysis for discrete and continuous  
32  
33 443 outcomes. *Biometrics* 1986;42:121-130.  
34  
35 444 16. Zeger SL, Liang KY, Albert P. Models for longitudinal data. A Generalized  
36  
37 445 Estimating Equation Approach. *Biometric* 1988;44(4):1049-1060.  
38  
39 446 17. Zhang H, Min J. A comparative study of GEE and MLM in a related data.  
40  
41 447 *Chinese Journal of Health Statistics* 2012;29(2):214-216.  
42  
43 448 18. National Bureau of Statistics of China National Economic and Social  
44  
45 449 Development Statistics Bulletin in 2011; 2012.  
46  
47 450 19. China Statistical Yearbook Beijing: China Statistical Press; 2009.  
48  
49 451 20. Xu K, Evans DB, Carrin G, et al. Protecting households from catastrophic  
50  
51 452 health spending. *Health Aff (Millwood)* 2007;26:972-83.  
52  
53 453 21. Yardim MS, Cilingiroglu N, Yardim N. Catastrophic health expenditure and  
54  
55 454 impoverishment in Turkey. *Health Policy* 2010;94:26-33.  
56  
57 455 22. Somkotra T, Lagrada LP. Which households are at risk of catastrophic health  
58  
59 456 spending: Experience in Thailand after universal coverage. *Health Affairs*

- 1  
2  
3 457 2009;28:467-478.  
4  
5 458 23. Li Y, Chi I, Zhang K, et al. Comparison of health services use by Chinese  
6  
7 459 urban and rural older adults in Yunnan province. *Geriatr Gerontol Int*  
8  
9 460 2006;6:260-269.  
10  
11 461 24. Xu K, Evans DB, Kawabata K, et al. Household catastrophic health  
12  
13 462 expenditure: a multicountry analysis. *Lancet* 2003;362:111-7.  
14  
15 463 25. Su TT, Kouyate B, Flessa S. Catastrophic household expenditure for health  
16  
17 464 care in a low-income society: a study from Nouna District, Burkina Faso. *Bull*  
18  
19 465 *World Health Organ* 2006;84:21-7.  
20  
21 466 26. Waters HR, Anderson GF, Mays J. Measuring financial protection in health in  
22  
23 467 the United States. *Health Policy* 2004;69:339-49.  
24  
25 468 27. Kawabata K, Xu K, Carrin G. Preventing impoverishment through protection  
26  
27 469 against catastrophic health expenditure. *Bull World Health Organ*  
28  
29 470 2002;80:612.  
30  
31 471 28. Flores G, Krishnakumar J, O'Donnell O, et al. Coping with health-care costs:  
32  
33 472 implications for the measurement of catastrophic expenditures and poverty.  
34  
35 473 *Health Econ* 2008;17:1393-412.  
36  
37 474 29. Zhao H. The significance of the new rural cooperative medical scheme for  
38  
39 475 China. *Theory Invest* 2007;5:107-109.  
40  
41 476 30. Wagstaff A, van Doorslaer E. Catastrophe and impoverishment in paying for  
42  
43 477 health care: with applications to Vietnam 1993-1998. *Health Econ*  
44  
45 478 2003;12:921-34.  
46  
47 479 31. Shanlian H, Shenglan T, Yuanli L, et al. Reform of how health care is paid for  
48  
49 480 in China: challenges and opportunities. *Lancet* 2008;372:1846-53.  
50  
51 481 32. Analysis report of national health services survey in China, 2013. Beijing:  
52  
53 482 Center for Health Statistics and Information, Ministry of Health China; 2016.  
54  
55 483 33. Zhou Z, Su Y, Gao J, et al. Assessing equity of healthcare utilization in rural  
56  
57 484 China: results from nationally representative surveys from 1993 to 2008.  
58  
59 485 *International Journal for Equity in Health* 2013;12(1):34.

1  
2  
3 486  
4  
5 487  
6  
7 488  
8 489  
9  
10 490  
11 491  
12 492  
13 493  
14 494  
15 495  
16 496  
17  
18  
19 497

**Table 1. Characteristics of all households enrolled in the study**

| Characteristics                                     | 2003 (N=180) |       | 2008 (N= 2326) |       | 2013 (N= 4469) |       |
|-----------------------------------------------------|--------------|-------|----------------|-------|----------------|-------|
|                                                     | n            | %     | n              | %     | n              | %     |
| <b>Household characteristics</b>                    |              |       |                |       |                |       |
| Number of household members                         |              |       |                |       |                |       |
| <5                                                  | 128          | 71.11 | 1916           | 82.37 | 3971           | 88.86 |
| ≥5                                                  | 52           | 28.89 | 410            | 17.63 | 498            | 11.14 |
| One or more members older than 60 years             |              |       |                |       |                |       |
| No                                                  | 104          | 57.78 | 1267           | 54.47 | 2003           | 44.82 |
| Yes                                                 | 76           | 42.22 | 1059           | 45.53 | 2466           | 55.18 |
| One or more members younger than 5 years            |              |       |                |       |                |       |
| No                                                  | 148          | 82.22 | 1948           | 83.75 | 3806           | 85.16 |
| Yes                                                 | 32           | 17.78 | 378            | 16.25 | 663            | 14.84 |
| Time spent travelling to the nearest medical center |              |       |                |       |                |       |
| ≤15min                                              | 145          | 80.56 | 1701           | 73.13 | 3532           | 79.03 |
| >15min                                              | 35           | 19.44 | 625            | 26.87 | 937            | 20.97 |
| The number                                          |              |       |                |       |                |       |



|                        |          |          |          |          |          |          |
|------------------------|----------|----------|----------|----------|----------|----------|
| of                     |          |          |          |          |          |          |
| observations           |          |          |          |          |          |          |
| in each region         |          |          |          |          |          |          |
| East                   | 113      | 62.78    | 626      | 26.91    | 991      | 22.17    |
| Centre                 | 14       | 7.78     | 759      | 32.63    | 1670     | 37.37    |
| West                   | 53       | 29.44    | 941      | 40.46    | 1808     | 40.46    |
| Annual                 |          |          |          |          |          |          |
| household              |          |          |          |          |          |          |
| income*                |          |          |          |          |          |          |
| Q 1                    | 2643.33  | 1265.69  | 3956.52  | 1680.38  | 4785.49  | 2590.40  |
| Q 2                    | 6914.23  | 1353.25  | 9062.74  | 1247.41  | 13003.64 | 2841.22  |
| Q 3                    | 13505    | 2716.15  | 14699.42 | 2065.84  | 25958.15 | 5174.25  |
| Q 4                    | 29194.35 | 10927.31 | 31665.48 | 20295.22 | 61082.23 | 44409.99 |
| <b>householders'</b>   |          |          |          |          |          |          |
| <b>characteristics</b> |          |          |          |          |          |          |
| Gender                 |          |          |          |          |          |          |
| Male                   | 131      | 72.78    | 1796     | 77.21    | 3373     | 75.48    |
| Female                 | 49       | 27.22    | 530      | 22.79    | 1096     | 24.52    |
| Age                    |          |          |          |          |          |          |
| <60                    | 120      | 66.67    | 1442     | 61.99    | 2262     | 50.62    |
| ≥60                    | 60       | 33.33    | 884      | 38.01    | 2207     | 49.38    |
| Marital status         |          |          |          |          |          |          |
| Unmarried              | 4        | 2.22     | 47       | 2.02     | 72       | 1.61     |
| Married                | 155      | 86.11    | 1953     | 83.96    | 3735     | 83.58    |
| Divorced               | 0        | 0        | 29       | 1.25     | 612      | 13.69    |
| Widow or               |          |          |          |          |          |          |
| others                 | 21       | 11.67    | 297      | 12.77    | 50       | 1.12     |
| Education              |          |          |          |          |          |          |
| Illiterate             | 52       | 28.89    | 511      | 21.98    | 811      | 18.15    |
| Elementary             |          |          |          |          |          |          |
| school                 | 71       | 39.44    | 917      | 39.44    | 1863     | 41.69    |
| Junior high            |          |          |          |          |          |          |
| school                 | 48       | 26.67    | 722      | 31.05    | 1418     | 31.73    |
| Senior high            |          |          |          |          |          |          |
| school or              | 9        | 5.00     | 175      | 7.53     | 377      | 8.44     |
| above                  |          |          |          |          |          |          |
| Employment             |          |          |          |          |          |          |
| Employed               | 126      | 70.00    | 1817     | 78.12    | 3222     | 72.10    |
| Retired                | 12       | 6.67     | 60       | 2.58     | 157      | 3.51     |
| Others                 | 42       | 23.33    | 449      | 19.30    | 1090     | 24.39    |

498 \*Annual household income of each year was divided into four levels according to the quartile, the  
 499 mean and standard deviation of each level were calculated.

**Table 2. Results of the incidence rates of CHE among all the studied households (%)**

| $R_{CHE}$ | 2003                 |                     |        | 2008                 |                     |        | 2013                 |                     |        |
|-----------|----------------------|---------------------|--------|----------------------|---------------------|--------|----------------------|---------------------|--------|
|           | Before reimbursement | After reimbursement | Change | Before reimbursement | After reimbursement | Change | Before reimbursement | After reimbursement | Change |
| Total     | 58.89                | 49.44               | 9.45   | 54.90                | 41.75               | 13.15  | 58.98                | 34.88               | 24.10  |
| East      | 58.41                | 50.44               | 7.97   | 58.79                | 46.49               | 12.30  | 63.47                | 39.56               | 23.91  |
| Centre    | 85.71                | 85.71               | 0      | 49.54                | 38.47               | 11.07  | 57.13                | 35.51               | 21.62  |
| West      | 52.83                | 37.74               | 15.09  | 56.64                | 41.23               | 15.41  | 58.24                | 31.75               | 26.49  |
| Q1        | 71.11                | 71.11               | 0      | 78.65                | 60.67               | 17.98  | 86.25                | 58.75               | 27.50  |
| Q2        | 60.47                | 48.84               | 11.63  | 59.32                | 44.30               | 15.02  | 73.61                | 43.13               | 30.48  |
| Q3        | 60.87                | 45.65               | 15.22  | 50.93                | 39.22               | 11.71  | 54.79                | 29.16               | 25.63  |
| Q4        | 43.48                | 32.61               | 10.87  | 37.23                | 27.88               | 9.35   | 32.86                | 18.39               | 14.47  |

1  
2  
3  
4  
5  
6  
7  
8  
9  
10  
11  
12  
13  
14  
15  
16  
17  
18  
19  
20  
21  
22  
23  
24  
25  
26  
27  
28  
29  
30  
31  
32  
33  
34  
35  
36  
37  
38  
39  
40  
41  
42  
43  
44  
45  
46  
47

**Table 3. Results of the severity of CHE among all the studied households (%)**

| Indicators               | 2003                 |                     |        | 2008                 |                     |        | 2013                 |                     |        |
|--------------------------|----------------------|---------------------|--------|----------------------|---------------------|--------|----------------------|---------------------|--------|
|                          | Before reimbursement | After reimbursement | Change | Before reimbursement | After reimbursement | Change | Before reimbursement | After reimbursement | Change |
| <i>G<sub>CHE</sub></i>   |                      |                     |        |                      |                     |        |                      |                     |        |
| Total                    | 21.51                | 12.57               | 8.94   | 23.23                | 10.08               | 13.15  | 41.65                | 8.15                | 33.50  |
| East                     | 19.54                | 13.56               | 5.98   | 28.54                | 12.54               | 16.00  | 56.92                | 10.51               | 46.41  |
| Centre                   | 25.12                | 25.12               | 0      | 20.28                | 8.74                | 11.54  | 38.00                | 8.29                | 29.71  |
| West                     | 24.73                | 7.15                | 17.58  | 22.09                | 9.52                | 12.57  | 36.64                | 6.72                | 29.92  |
| Q1                       | 26.37                | 21.66               | 4.71   | 42.80                | 16.32               | 26.48  | 86.46                | 15.96               | 70.50  |
| Q2                       | 28.51                | 12.94               | 15.57  | 22.77                | 10.17               | 12.60  | 57.13                | 9.57                | 47.56  |
| Q3                       | 18.70                | 9.06                | 9.64   | 17.38                | 8.57                | 8.81   | 28.70                | 6.02                | 22.68  |
| Q4                       | 13.01                | 6.85                | 6.16   | 13.56                | 6.55                | 7.01   | 13.90                | 4.05                | 9.85   |
| <i>MPG<sub>CHE</sub></i> |                      |                     |        |                      |                     |        |                      |                     |        |
| Total                    | 36.52                | 25.43               | 11.09  | 42.32                | 24.14               | 18.18  | 70.61                | 23.35               | 47.26  |
| East                     | 33.46                | 26.88               | 6.58   | 48.54                | 26.97               | 21.57  | 89.67                | 26.58               | 63.09  |
| Centre                   | 29.31                | 29.31               | 0      | 40.94                | 22.73               | 18.21  | 66.53                | 23.33               | 43.20  |
| West                     | 46.82                | 18.95               | 27.87  | 39.00                | 23.09               | 15.91  | 62.91                | 21.16               | 41.75  |
| Q1                       | 37.07                | 30.46               | 6.61   | 54.41                | 26.90               | 27.51  | 100.24               | 27.17               | 73.07  |
| Q2                       | 47.15                | 26.50               | 20.65  | 38.38                | 22.96               | 15.42  | 77.61                | 22.19               | 55.42  |
| Q3                       | 30.72                | 19.84               | 10.88  | 34.12                | 21.86               | 12.26  | 52.38                | 20.65               | 31.73  |
| Q4                       | 29.93                | 21.01               | 8.92   | 36.42                | 23.48               | 12.94  | 42.32                | 22.03               | 20.29  |

**Table 4. The influence of NCMS on the incidence rates of CHE**

|                | Year | Change (%) | Crude           |               | Adjusted        |               |
|----------------|------|------------|-----------------|---------------|-----------------|---------------|
|                |      |            | OR (95 % CI)    | Increment (%) | OR (95 % CI)    | Increment (%) |
| <b>Total</b>   |      |            |                 |               |                 |               |
|                | 2003 | 9.45       | 1.46(1.23-1.74) | -             | 1.50(1.24-1.81) | -             |
|                | 2008 | 13.15      | 1.70(1.61-1.80) | 16.44         | 1.79(1.69-1.90) | 19.33         |
|                | 2013 | 24.10      | 2.68(2.54-2.83) | 57.65         | 2.94(2.77-3.11) | 64.25         |
| <b>Area</b>    |      |            |                 |               |                 |               |
| <b>East</b>    |      |            |                 |               |                 |               |
|                | 2003 | 7.97       | 1.38(1.13-1.69) | -             | 1.43(1.14-1.80) | -             |
|                | 2008 | 12.30      | 1.64(1.48-1.82) | 18.84         | 1.77(1.57-1.99) | 23.78         |
|                | 2013 | 23.91      | 2.66(2.37-2.97) | 62.20         | 3.08(2.71-3.50) | 74.01         |
| <b>Central</b> |      |            |                 |               |                 |               |
|                | 2003 | 0          | 1.00(1.00-1.00) | -             | 1.00(1.00-1.00) | -             |
|                | 2008 | 11.07      | 1.57(1.43-1.72) | 57            | 1.64(1.49-1.82) | 64.00         |
|                | 2013 | 21.62      | 2.42(2.23-2.63) | 54.14         | 2.63(2.40-2.88) | 60.37         |
| <b>West</b>    |      |            |                 |               |                 |               |
|                | 2003 | 15.09      | 1.85(1.24-2.75) | -             | 1.86(1.23-2.82) | -             |
|                | 2008 | 15.41      | 1.86(1.69-2.05) | 0.54          | 1.96(1.77-2.16) | 5.38          |
|                | 2013 | 26.49      | 3.00(2.74-3.28) | 61.29         | 3.22(2.93-3.55) | 64.29         |
| <b>Income</b>  |      |            |                 |               |                 |               |
| <b>Q1</b>      |      |            |                 |               |                 |               |
|                | 2003 | 0          | 1.00(1.00-1.00) | -             | 1.00(1.00-1.00) | -             |
|                | 2008 | 17.98      | 2.39(2.03-2.81) | 139.00        | 2.56(2.16-3.04) | 156.00        |
|                | 2013 | 27.50      | 4.40(3.70-5.24) | 84.10         | 4.65(3.89-5.55) | 81.64         |
| <b>Q2</b>      |      |            |                 |               |                 |               |
|                | 2003 | 11.63      | 1.60(1.08-2.37) | -             | 1.63(1.08-2.45) | -             |
|                | 2008 | 15.02      | 1.83(1.62-2.08) | 14.38         | 1.90(1.67-2.16) | 16.56         |
|                | 2013 | 30.48      | 3.68(3.19-4.25) | 101.09        | 3.86(3.32-4.49) | 103.16        |
| <b>Q3</b>      |      |            |                 |               |                 |               |
|                | 2003 | 15.22      | 1.85(1.21-2.84) | -             | 1.89(1.23-1.92) | -             |
|                | 2008 | 11.71      | 1.61(1.44-1.80) | -12.97        | 1.63(1.46-1.83) | -13.76        |
|                | 2013 | 25.63      | 2.94(2.68-3.23) | 82.61         | 3.04(2.76-3.35) | 86.50         |
| <b>Q4</b>      |      |            |                 |               |                 |               |
|                | 2003 | 10.87      | 1.59(1.08-2.34) | -             | 1.62(1.08-2.41) | -             |
|                | 2008 | 9.35       | 1.53(1.39-1.69) | -3.77         | 1.55(1.41-1.72) | -4.32         |
|                | 2013 | 14.47      | 2.17(1.94-2.43) | 41.83         | 2.21(1.97-2.48) | 42.58         |

1  
2  
3  
4  
5  
6  
7  
8  
9  
10  
11  
12  
13  
14  
15  
16  
17  
18  
19  
20  
21  
22  
23  
24  
25  
26  
27  
28  
29  
30  
31  
32  
33  
34  
35  
36  
37  
38  
39  
40  
41  
42  
43  
44  
45  
46  
47  
48  
49  
50  
51  
52  
53  
54  
55  
56  
57  
58  
59  
60

For peer review only

### Supplementary data 1 The questions in the questionnaire of NHSS employed to calculate indicators

Food consumption expenditure in each household was measured by the question, “How much did your household spend in food consumption expenditure during the last one year?”

The question, “How much did your household spend in living expenditure during the last one year?” was chosen to measure the total living expenditure in each household.

Actual household size was measured by the question, “How many people have a long-term residence at your household?”

The question, “How much did your household spend in medical expenses (without compensations from a third party) during the last one year” was chosen to measure the out-of-pocket health expenditure payment in each household.

### Supplementary data 2

**Table 1 Determinants of catastrophic health expenditure.**

| Determinant                                     | $\beta$ (95%CI)    | SE   | Z     | P      |
|-------------------------------------------------|--------------------|------|-------|--------|
| <b>Gender of householder</b> (male vs female)   | -0.51(-0.62--0.40) | 0.06 | -8.94 | <.0001 |
| <b>Age of householder</b>                       | 0.28(0.11-0.46)    | 0.09 | 3.12  | 0.0018 |
| <b>Educational level of householder</b>         |                    |      |       |        |
| Elementary school vs Illiterate                 | -0.35(-0.48--0.22) | 0.07 | -5.31 | <.0001 |
| Junior high school vs Illiterate                | -0.49(-0.64--0.35) | 0.07 | -6.84 | <.0001 |
| Senior high school or above vs Illiterate       | -0.90(-1.11--0.70) | 0.11 | -8.56 | <.0001 |
| <b>One or more members older than 60 years</b>  | 0.39(0.21-0.56)    | 0.09 | 4.35  | <.0001 |
| (yes vs no)                                     |                    |      |       |        |
| <b>One or more members younger than 5 years</b> | 0.03(-0.11-0.17)   | 0.07 | 0.37  | 0.7104 |
| (yes vs no)                                     |                    |      |       |        |
| <b>Number of household members</b>              | -0.27(-0.31--0.24) | 0.02 | -14.3 | <.0001 |
| <b>Employment</b> (employed vs others)          | -0.81(-0.97--0.65) | 0.08 | -7.58 | <.0001 |
| <b>Marital status</b> (married vs others)       | -0.63(-0.78--0.48) | 0.08 | -7.24 | <.0001 |

### Supplementary data 3 The definition of poverty line

The poverty line is defined as the average food expenditure of the household whose food expenditure share of total household expenditure is within the 45th and 55th percentile of the total sample.<sup>1</sup> Considering the economy scale of household consumption, the household equivalence scale is used rather than actual household

size. The equivalence scale is:

$$eqsize_h = hhsiz_e_h^\beta$$

where  $hhsiz_e_h$  is the household size.  $\beta$  equals 0.56.

The poverty line can be calculated as follows:

1. Generate the food expenditure share ( $foodexp_h$ ) for each household by dividing the household's food expenditure by its total expenditure

$$foodexp_h = \frac{food_h}{exp_h}$$

2. Generate the equivalent household size for each household as

$$eqsize_h = hhsiz_e_h^{0.56}$$

3. Divide each household food expenditure by the equivalent household size to get equivalized food expenditures ( $eqfood_h$ )

$$eqfood_h = \frac{food_h}{eqsize_h}$$

4. Identify the food expenditure shares of total household expenditure that are at the 45<sup>th</sup> and 55<sup>th</sup> percentile across the whole sample, name these two variables as  $food45$  and  $food55$ . If the survey includes a household weighting variable, the percentile calculation should consider the weight.
5. Calculate the weighted average of food expenditure in the 45<sup>th</sup> to 55<sup>th</sup> percentile range. This is exactly the poverty line ( $pl$ )

$$pl = \frac{\sum w_h * eqfood_h}{\sum w_h} \text{ where } food45 < foodexp_h < food55$$

## References

1. Xu K. Distribution of health payments and catastrophic expenditures methodology. Geneva: Department of Health System Financing, WHO; 2005.

**STROBE 2007 (v4) checklist of items to be included in reports of observational studies in epidemiology\***  
**Checklist for cohort, case-control, and cross-sectional studies (combined)**

| Section/Topic             | Item # | Recommendation                                                                                                                                                                                                                                                                                                                                                                                                                                                         | Reported on page # |
|---------------------------|--------|------------------------------------------------------------------------------------------------------------------------------------------------------------------------------------------------------------------------------------------------------------------------------------------------------------------------------------------------------------------------------------------------------------------------------------------------------------------------|--------------------|
| Title and abstract        | 1      | (a) Indicate the study's design with a commonly used term in the title or the abstract                                                                                                                                                                                                                                                                                                                                                                                 | 2                  |
|                           |        | (b) Provide in the abstract an informative and balanced summary of what was done and what was found                                                                                                                                                                                                                                                                                                                                                                    | 2                  |
| <b>Introduction</b>       |        |                                                                                                                                                                                                                                                                                                                                                                                                                                                                        |                    |
| Background/rationale      | 2      | Explain the scientific background and rationale for the investigation being reported                                                                                                                                                                                                                                                                                                                                                                                   | 4                  |
| Objectives                | 3      | State specific objectives, including any pre-specified hypotheses                                                                                                                                                                                                                                                                                                                                                                                                      | 4                  |
| <b>Methods</b>            |        |                                                                                                                                                                                                                                                                                                                                                                                                                                                                        |                    |
| Study design              | 4      | Present key elements of study design early in the paper                                                                                                                                                                                                                                                                                                                                                                                                                | 7                  |
| Setting                   | 5      | Describe the setting, locations, and relevant dates, including periods of recruitment, exposure, follow-up, and data collection                                                                                                                                                                                                                                                                                                                                        | 5                  |
| Participants              | 6      | (a) <i>Cohort study</i> —Give the eligibility criteria, and the sources and methods of selection of participants. Describe methods of follow-up<br><i>Case-control study</i> —Give the eligibility criteria, and the sources and methods of case ascertainment and control selection. Give the rationale for the choice of cases and controls<br><i>Cross-sectional study</i> —Give the eligibility criteria, and the sources and methods of selection of participants | 5                  |
|                           |        | (b) <i>Cohort study</i> —For matched studies, give matching criteria and number of exposed and unexposed<br><i>Case-control study</i> —For matched studies, give matching criteria and the number of controls per case                                                                                                                                                                                                                                                 |                    |
| Variables                 | 7      | Clearly define all outcomes, exposures, predictors, potential confounders, and effect modifiers. Give diagnostic criteria, if applicable                                                                                                                                                                                                                                                                                                                               | 5-7                |
| Data sources/ measurement | 8*     | For each variable of interest, give sources of data and details of methods of assessment (measurement). Describe comparability of assessment methods if there is more than one group                                                                                                                                                                                                                                                                                   | 5,7                |
| Bias                      | 9      | Describe any efforts to address potential sources of bias                                                                                                                                                                                                                                                                                                                                                                                                              |                    |
| Study size                | 10     | Explain how the study size was arrived at                                                                                                                                                                                                                                                                                                                                                                                                                              |                    |
| Quantitative variables    | 11     | Explain how quantitative variables were handled in the analyses. If applicable, describe which groupings were chosen and why                                                                                                                                                                                                                                                                                                                                           | 7                  |
| Statistical methods       | 12     | (a) Describe all statistical methods, including those used to control for confounding                                                                                                                                                                                                                                                                                                                                                                                  | 7                  |
|                           |        | (b) Describe any methods used to examine subgroups and interactions                                                                                                                                                                                                                                                                                                                                                                                                    | 7                  |
|                           |        | (c) Explain how missing data were addressed                                                                                                                                                                                                                                                                                                                                                                                                                            |                    |
|                           |        | (d) <i>Cohort study</i> —If applicable, explain how loss to follow-up was addressed<br><i>Case-control study</i> —If applicable, explain how matching of cases and controls was addressed                                                                                                                                                                                                                                                                              |                    |



|                          |     |                                                                                                                                                                                                              |       |
|--------------------------|-----|--------------------------------------------------------------------------------------------------------------------------------------------------------------------------------------------------------------|-------|
|                          |     | <i>Cross-sectional study</i> —If applicable, describe analytical methods taking account of sampling strategy                                                                                                 | 5     |
|                          |     | (e) Describe any sensitivity analyses                                                                                                                                                                        |       |
| <b>Results</b>           |     |                                                                                                                                                                                                              |       |
| Participants             | 13* | (a) Report numbers of individuals at each stage of study—eg numbers potentially eligible, examined for eligibility, confirmed eligible, included in the study, completing follow-up, and analysed            | 5     |
|                          |     | (b) Give reasons for non-participation at each stage                                                                                                                                                         | 5     |
|                          |     | (c) Consider use of a flow diagram                                                                                                                                                                           |       |
| Descriptive data         | 14* | (a) Give characteristics of study participants (eg demographic, clinical, social) and information on exposures and potential confounders                                                                     | 8     |
|                          |     | (b) Indicate number of participants with missing data for each variable of interest                                                                                                                          |       |
|                          |     | (c) <i>Cohort study</i> —Summarise follow-up time (eg, average and total amount)                                                                                                                             |       |
| Outcome data             | 15* | <i>Cohort study</i> —Report numbers of outcome events or summary measures over time                                                                                                                          |       |
|                          |     | <i>Case-control study</i> —Report numbers in each exposure category, or summary measures of exposure                                                                                                         |       |
|                          |     | <i>Cross-sectional study</i> —Report numbers of outcome events or summary measures                                                                                                                           | 8     |
| Main results             | 16  | (a) Give unadjusted estimates and, if applicable, confounder-adjusted estimates and their precision (eg, 95% confidence interval). Make clear which confounders were adjusted for and why they were included | 9     |
|                          |     | (b) Report category boundaries when continuous variables were categorized                                                                                                                                    | 19    |
|                          |     | (c) If relevant, consider translating estimates of relative risk into absolute risk for a meaningful time period                                                                                             |       |
| Other analyses           | 17  | Report other analyses done—eg analyses of subgroups and interactions, and sensitivity analyses                                                                                                               | 8-9   |
| <b>Discussion</b>        |     |                                                                                                                                                                                                              |       |
| Key results              | 18  | Summarise key results with reference to study objectives                                                                                                                                                     | 10-12 |
| Limitations              | 19  | Discuss limitations of the study, taking into account sources of potential bias or imprecision. Discuss both direction and magnitude of any potential bias                                                   | 3     |
| Interpretation           | 20  | Give a cautious overall interpretation of results considering objectives, limitations, multiplicity of analyses, results from similar studies, and other relevant evidence                                   | 10-13 |
| Generalisability         | 21  | Discuss the generalisability (external validity) of the study results                                                                                                                                        | 13    |
| <b>Other information</b> |     |                                                                                                                                                                                                              |       |
| Funding                  | 22  | Give the source of funding and the role of the funders for the present study and, if applicable, for the original study on which the present article is based                                                | 14    |

\*Give information separately for cases and controls in case-control studies and, if applicable, for exposed and unexposed groups in cohort and cross-sectional studies.

**Note:** An Explanation and Elaboration article discusses each checklist item and gives methodological background and published examples of transparent reporting. The STROBE checklist is best used in conjunction with this article (freely available on the Web sites of PLoS Medicine at <http://www.plosmedicine.org/>, Annals of Internal Medicine at <http://www.annals.org/>, and Epidemiology at <http://www.epidem.com/>). Information on the STROBE Initiative is available at [www.strobe-statement.org](http://www.strobe-statement.org).
